1  
2  
3  
4  
5  
6  
7  
8  
9  
10  
11  
12  
13  
14  
15  
16  
17

**Title:** A neural mechanism of cognitive reserve: The case of bilingualism

**Authors:** W. Dale Stevens<sup>1\*</sup>, Naail Khan<sup>1</sup>, John A. E. Anderson<sup>2</sup>, Cheryl L. Grady<sup>3,4</sup>, Ellen Bialystok<sup>1,3</sup>

**Affiliations:**

<sup>1</sup>Department of Psychology, York University, Toronto, Canada.

<sup>2</sup>Department of Cognitive Science, Carleton University, Ottawa, Canada.

<sup>3</sup>Rotman Research Institute at Baycrest Hospital, Toronto, Canada.

<sup>4</sup>Departments of Psychology and Psychiatry, University of Toronto, Toronto, Canada.

\*Corresponding author: Email Address: [stevensd@yorku.ca](mailto:stevensd@yorku.ca) (W.D. Stevens)

18 Abstract

19

20 Cognitive Reserve (CR) refers to the preservation of cognitive function in the face of age- or  
21 disease-related neuroanatomical decline. While bilingualism is known to contribute to CR, the  
22 extent to which, and what particular aspect of, second language experience contributes to CR are  
23 debated, and the underlying neural mechanism(s) unknown. Intrinsic functional connectivity  
24 reflects experience-dependent neuroplasticity that occurs across timescales ranging from minutes  
25 to decades, and may be a neural mechanism underlying CR. To test this hypothesis, we used  
26 voxel-based morphometry and resting-state functional connectivity analyses of MRI data to  
27 compare structural and functional brain integrity between bilingual and monolingual older adults,  
28 matched on cognitive performance using a rigorous propensity score matching technique, and  
29 across levels of second language proficiency measured as a continuous variable. Bilingualism,  
30 and degree of second language proficiency in particular, were associated with lower grey matter  
31 integrity in a hub of the default mode network – a region that is particularly vulnerable to decline  
32 in aging and dementia – but preserved functional network organization that resembled the young  
33 adult brain. Our findings confirm that lifelong bilingualism contributes to CR through  
34 experience-dependent maintenance of optimal functional network structure of the domain-  
35 general attentional control network across the lifespan.

36 Multiple factors contribute to Cognitive Reserve (CR) across the lifespan, such as education,  
37 occupation, and intellectual and social engagement (Cabeza et al., 2018; Song et al., 2022; Stern,  
38 2021). There is compelling evidence that lifelong bilingualism also contributes to CR (Anderson  
39 et al., 2020; Bialystok, 2021). Relative to their monolingual peers, bilingual older adults 1) have  
40 better cognitive function, given similar levels of neuroanatomical decline, 2) demonstrate signs  
41 of dementia later in life, 3) show more significant neuroanatomical pathology, given similar  
42 levels of dementia, and 4) show more rapid rates of cognitive decline in later stages of dementia  
43 (Bialystok, 2021). Bilingual individuals must continuously exert cognitive control to  
44 appropriately direct their attention towards one situationally relevant language of two that are  
45 simultaneously active in mind and competing for attention (Kroll et al., 2014; van Heuven et al.,  
46 2008). Evidence suggests that this ongoing need for selection leads to an adaptation in domain-  
47 general attentional control that enhances multiple subordinate cognitive control process across a  
48 range of tasks and mitigates typical age-related cognitive decline (Bialystok, 2015; Bialystok and  
49 Craik, 2022). This adaptation is the foundation for CR in bilingualism (Bialystok, 2021). Thus,  
50 bilingualism serves as a useful proxy for investigating neural mechanisms underlying CR. Given  
51 the evidence that lifelong bilingualism is a CR factor, two predictions are that 1) given equal  
52 neuroanatomical health, bilinguals will have better cognitive performance than monolinguals and  
53 2) given equal cognitive performance, bilinguals will have poorer neuroanatomical health than  
54 monolinguals. Both relationships have been confirmed in recent work (Anderson et al., 2021;  
55 Berkes et al., 2021; Brian T. Gold et al., 2013; Perani et al., 2017; Schweizer et al., 2012).

56

57 The neural mechanism underlying CR in bilingualism is unknown. Studies investigating  
58 differences in brain structure associated with bilingualism have produced mixed, often

59 contradictory results. For example, while some studies have shown better structural integrity in  
60 bilingual than monolingual individuals (John A.E. Anderson et al., 2018; Luk et al., 2011;  
61 Marin-Marín et al., 2020; Olsen et al., 2015), others have shown the opposite (Anderson et al.,  
62 2021; Brian T. Gold et al., 2013; Schweizer et al., 2012), or dissociable patterns of grey vs. white  
63 matter integrity (Macbeth et al., 2021). While the underlying neural mechanisms by which  
64 augmented cognitive engagement across the lifespan leads to preservation of cognitive faculties  
65 in later life are undetermined, there might be multiple pathways to CR (Oh et al., 2018). Another  
66 possibility is that CR might result from adaptive shifts in cognitive strategy or more efficient  
67 task-related engagement of brain regions or circuits (Abutalebi et al., 2012; Anderson et al.,  
68 2021; B. T. Gold et al., 2013). A third possibility is that experience-dependent maintenance or  
69 enhancement of the brain's long-term intrinsic functional network integrity could be a neural  
70 mechanism underlying CR (Chan et al., 2021, 2018; N. Franzmeier et al., 2017; Nicolai  
71 Franzmeier et al., 2017b; Weiler et al., 2018; Wig, 2017).

72

73 RSFC, which can be quantified by analyzing spontaneous fluctuations of the blood-oxygen-  
74 level-dependent (BOLD) signal in resting-state functional MRI (fMRI) data, reflects the brain's  
75 intrinsic large-scale functional network architecture [for example, see refs. (Biswal et al., 1995;  
76 Fox and Raichle, 2007)]. RSFC plays a central role in human cognition through a Hebbian-like  
77 mechanism, whereby repeated experience-driven coupling or decoupling of task-related activity  
78 among brain regions over time lead to enduring increases or decreases in RSFC among these  
79 regions, respectively (Stevens and Spreng, 2014). This, in turn, facilitates or inhibits future  
80 coupling (Kelly and Castellanos, 2014), thus enhancing or optimizing cognitive performance  
81 with experience over time. Thus, RSFC reflects a previously unappreciated mechanism of long-

82 term neurocognitive plasticity that allows past experiences to mold sustained functional network  
83 architecture to facilitate future cognitive performance. Research on RSFC has demonstrated that  
84 1) it can be modulated by ongoing or recent experience across functionally relevant brain  
85 regions/circuits/networks on relatively short timescales ranging from minutes to days (Martin et  
86 al., 2021); 2) the degree of sustained experience-dependent change predicts learning, memory  
87 consolidation, and future performance (Lewis et al., 2009; Stevens et al., 2010; Tambini et al.,  
88 2010); 3) patterns of RSFC are correlated with individual differences in personality, behavior,  
89 and cognition (Adelstein et al., 2011; Nostro et al., 2018); and 4) differential patterns of RSFC  
90 are associated with neurodevelopmental and neurodegenerative disorders, and the extent of  
91 neurocognitive decline/preservation in old age (Stevens and Spreng, 2014; Wig, 2017). Thus,  
92 RSFC reflects a critical process underlying long-term neurocognitive plasticity that facilitates the  
93 development, specialization, stabilization, and preservation of large-scale functional brain  
94 networks across the lifespan. While there may be multiple pathways to CR, we propose that  
95 experience-dependent maintenance of intrinsic functional networks is a fundamental neural  
96 mechanism that could underly the phenomenon of CR in lifelong bilingualism.

97

98 Various RSFC analytic techniques can be used to parcellate the brain into multiple functionally  
99 dissociable regions that are organized into large-scale functional sub-networks with varying  
100 degrees of spatial resolution (Power et al., 2011; Schaefer et al., 2018; Wig et al., 2014; Yeo et  
101 al., 2011). Previous work has focussed on three specific sub-networks that play foundational  
102 roles in higher cognitive functioning (Grady et al., 2016; Setton et al., 2022; Spreng et al., 2013;  
103 Spreng and Schacter, 2012): 1) the dorsal attention network (DAN), involved in externally  
104 focussed cognition; 2) the default mode network (DMN), involved in internally focussed

105 cognition; and 3) the frontoparietal control network (FPCN), which facilitates volitional control  
106 over the locus of attention by flexibly alternating its coupling between the DAN vs. DMN during  
107 externally vs. internally focussed cognition, respectively (Spreng et al., 2010). Critically,  
108 different nodes within these networks play specialized roles in facilitating within-network  
109 communication and cross-network interactions among these networks, a set of dynamics that can  
110 be characterized and quantified using graph theory analyses (Rubinov and Sporns, 2010; Wig et  
111 al., 2011). Previous work has identified two discrete nodes of the FPCN within the left middle  
112 frontal gyrus (MFG) that play opposite but complementary roles – an anterior region (aMFG;  
113 Brodmann area (BA) 9) that has dense within-network connections but little cross-network  
114 connectivity with other networks (i.e., a “provincial hub node”), and a posterior region (pMFG;  
115 BA 6), which has high betweenness centrality, a measure of the extent to which a node  
116 contributes to communication across networks (i.e., a “connector node”) (Spreng et al., 2013).  
117 These two nodes are thought to play critical roles in attentional control through mediating  
118 within-network communication of the FPCN, and dynamic flexibility of cross-network coupling  
119 with the DAN and DMN, respectively (Spreng et al., 2013). There is evidence that age-related  
120 cognitive decline is related to functional connectivity changes most prominently within the  
121 FPCN (Campbell et al., 2012), and of the MFG in particular (Spreng et al., 2018).

122

123 While some aspects of cognition decline in old age, such as working memory, episodic memory,  
124 and processing speed, others remain stable or improve across the lifespan, such as semantic  
125 memory and verbal knowledge (Park et al., 2002). This pattern of age-related change has been  
126 characterized as a shift from fluid to crystalized cognition in later life (Craik and Bialystok,  
127 2006), and it is correlated with increased RSFC of the left middle frontal gyrus, a core node of

128 the FPCN, with the DMN – a phenomenon characterized by the “default-executive coupling  
129 hypothesis of aging” (DECHA) (Spreng and Turner, 2019). The DECHA is consistent with prior  
130 work demonstrating that 1) unlike young adults, older adults “fail to deactivate” the DMN during  
131 externally focussed cognition (Grady et al., 2006; Lustig et al., 2003; Miller et al., 2008) and 2)  
132 age-related differences in how the FPCN connects with other networks impacts both the function  
133 of these other networks and cognitive ability in older adults (Grady et al., 2016).

134  
135 Here, we investigated the hypothesis that lifelong bilingualism contributes to CR by mitigating  
136 the typical age-related changes in functional connectivity of the FPCN described above (e.g.,  
137 DECHA (Spreng et al., 2018)), specifically, by bolstering functional integration within the  
138 FPCN and maintaining the dynamic flexibility of its cross-network coupling with the DMN and  
139 DAN (Spreng et al., 2010). To isolate the extent to which lifelong bilingualism contributes to  
140 CR, one must either compare cognitive performance between monolingual and bilingual groups  
141 equated for neuroanatomical health (Berkes et al., 2021), with the expectation that bilinguals will  
142 outperform monolinguals; or alternatively, compare differences in brain structure and function  
143 between groups equated for cognitive performance (John A.E. Anderson et al., 2018), with the  
144 expectation that bilinguals will show more prominent signs of neuroanatomical aging. Here, we  
145 took the latter approach, and compared brain structure and intrinsic functional network integrity  
146 in groups of monolingual vs. bilingual older adults equated on multiple measures of cognitive  
147 performance and demographic variables using a rigorous propensity score matching (PSM)  
148 technique. Recent research has also supported the view that bilingualism is better characterized  
149 and investigated as a multidimensional set of continuous variables on which individuals vary  
150 based on language experience, rather than a dichotomous variable separating individuals into

151 ostensibly homogenous groups (Dash et al., 2022; DeLuca et al., 2019; Gullifer and Titone,  
152 2020; Macbeth et al., 2021; Sulpizio et al., 2020). Moreover, previous behavioural research has  
153 implicated the active use and proficiency of a second language as the critical factor that might  
154 contribute most to CR in bilingual older adults (Calabria et al., 2020). Thus, we also assessed the  
155 degree to which these measures of structural and functional brain integrity are associated with  
156 second language proficiency, measured as a continuous variable across all older adults in our  
157 sample. We predicted that bilingual older adults would show more prominent signs of  
158 neuroanatomical aging (i.e., “older looking” brain structure), but preserved integrity of intrinsic  
159 functional network connectivity (i.e., “younger looking” brain functional organization) relative  
160 to cognitively matched monolinguals, who would show typical patterns of degraded functional  
161 network connectivity associated with aging. Specifically, we hypothesized that 1) bilingual older  
162 adults will show lower grey matter integrity in brain regions that are particularly susceptible to  
163 age-related decline (e.g., DMN regions); 2) bilinguals will show less default-executive coupling,  
164 i.e., RSFC between the MFG and the DMN, a hallmark characteristic of neurocognitive aging  
165 (Spreng and Turner, 2019); 3) bilinguals will show preserved flexibility of cross-network RSFC  
166 of the MFG with the DAN and DMN; and 4) these measures of structural and functional integrity  
167 will be associated with second language proficiency specifically, across all older adults.

168

## 169 **Results**

170 Ninety-three right-handed older adult participants (age: mean  $\pm$  SD = 74.04  $\pm$  3.86, range = 68-  
171 85; 63 female) with no history of heart disease, neurological or psychological disorders, or  
172 traumatic brain injuries, were recruited from the local area surrounding York University,  
173 Toronto, Canada (Note: An additional 3 participants were recruited but not included in this



174 study, due to excessive head motion in the MRI scanner). Behavioral and structural MRI data  
175 from a subset of these participants have been analyzed in previous reports (Anderson et al., 2021,  
176 2017; John A.E. Anderson et al., 2018). The Language and Social Background Questionnaire  
177 [LSBQ (John A. E. Anderson et al., 2018)] was used to categorize participants as monolingual or  
178 bilingual (LSBQ composite score) and to assign a score on second language proficiency (LSBQ  
179 factor), a continuous variable. Participants were interviewed via telephone to validate language  
180 status, and those who could not be reliably identified as monolingual or bilingual were not  
181 included in the study. Forty-seven participants (29 female) were identified as bilingual and 46  
182 (34 female) were identified as monolingual. All participants completed the D-KEFS battery  
183 (Delis et al., 2001), comprising multiple neuropsychological tests of executive function, and the  
184 Mini-Mental State Examination [MMSE (Folstein et al., 1975)]. We used a PSM technique to  
185 equate the groups across performance on multiple cognitive measures (MMSE, Trail Making  
186 Task (letter-number-switching score), Shipley-2 verbal score, Shipley-2 block patterns score), as  
187 well as demographic variables (age, education, gender), similar to previous work (John A.E.  
188 Anderson et al., 2018). We used voxel-based morphometry (VBM) analysis of structural MRI  
189 data, and RSFC analyses of resting-state fMRI data, to compare neuroanatomical and intrinsic  
190 functional network integrity, respectively, between the groups and across second language  
191 proficiency.

192

### 193 **Propensity score matching on cognitive measures and demographic variables**

194 Previous research has used sequential bivariate matching; however, this fails to account for  
195 potential multivariate interactions between the matching variables and may introduce bias into  
196 participant selection when using a high dimensional set of matching criteria (John A.E. Anderson

197 et al., 2018; Ho et al., 2007; Rosenbaum and Rubin, 1983). With PSM, a propensity score for  
198 each individual is obtained by using logistic regression to predict group membership, given a set  
199 of observed covariates. Participants from one group are then individually matched to those in the  
200 second group based on propensity scores (Rosenbaum and Rubin, 1983). PSM can account for  
201 multivariate interactions, minimizes selection error when using a large number of matching  
202 variables, and is better suited for smaller sample sizes, as is often the case in neuroimaging  
203 studies (Austin and Steyerberg, 2015; Ho et al., 2007; Rosenbaum and Rubin, 1983). To  
204 prioritize matching the monolingual and bilingual groups on cognitive performance, PSM was  
205 done using the MatchIt R package (Ho et al., 2011) in a 2-stage hierarchical manner. The first  
206 stage matched the groups on 4 neuropsychological measures: MMSE, Trail Making Task (letter-  
207 number-switching score), Shipley-2 verbal score, and Shipley-2 block patterns score. Using the  
208 propensity scores, each bilingual participant was matched to a monolingual; bilinguals that could  
209 not be matched, and any remaining monolinguals, were removed from the matched-group  
210 analyses. The distribution of propensity scores for the matched monolingual and bilingual  
211 groups, as well as for the excluded participants from each of the unmatched groups, are shown in  
212 Supplementary Figure 1a. Once the groups were matched on cognitive performance, they were  
213 then matched on 3 demographic variables (age, education, and sex) using the same procedure.  
214 The distribution of propensity scores for the two matched groups following the second stage are  
215 shown in Supplementary Figure 1b. The absolute standardized mean difference between  
216 monolinguals and bilinguals on each of the matching variables for the matched vs. unmatched  
217 groups are shown in Supplementary Figure 1c. Following the PSM procedure, the final group  
218 sizes were 39 monolinguals (age: mean  $\pm$  SD = 73.51  $\pm$  3.25, range = 68-79; 30 female) and 39

219 bilinguals (age: mean  $\pm$  SD = 73.87  $\pm$  4.00, range = 69-83; 23 female). The matched groups did  
 220 not differ significantly on any of the cognitive or demographic variables (Table 1).

221

222 Table 1. Participant information, demographics, and test scores.

|                          | Matched Groups |       |             |       |          | Unmatched Group |       |             |       |          |              |       |
|--------------------------|----------------|-------|-------------|-------|----------|-----------------|-------|-------------|-------|----------|--------------|-------|
|                          | ML (n = 39)    |       | BL (n = 39) |       | <i>p</i> | ML (n = 46)     |       | BL (n = 47) |       | <i>p</i> | ALL (n = 93) |       |
|                          | M              | SD    | M           | SD    |          | M               | SD    | M           | SD    |          | M            | SD    |
| <b>Demographics</b>      |                |       |             |       |          |                 |       |             |       |          |              |       |
| Age                      | 73.51          | 3.25  | 73.87       | 4.00  | 0.665    | 74.04           | 3.89  | 74.04       | 4.00  | 0.999    | 74.04        | 3.86  |
| Education                | 3.82           | 0.88  | 3.92        | 0.90  | 0.613    | 3.82            | 0.95  | 3.27        | 0.93  | 0.842    | 3.80         | 0.94  |
| Sex (female/male)        | 30/9           |       | 23/16       |       |          | 34/12           |       | 29/18       |       |          | 63/30        |       |
| <b>MMSE</b>              | 29.28          | 1.10  | 29.31       | 0.92  | 0.911    | 29.28           | 1.09  | 29.21       | 1.16  | 0.765    | 29.24        | 0.89  |
| <b>Shipley</b>           |                |       |             |       |          |                 |       |             |       |          |              |       |
| Verbal                   | 108.56         | 7.55  | 106.61      | 8.93  | 0.301    | 109.74          | 7.52  | 101.55      | 17.03 | 0.003*   | 105.60       | 13.77 |
| Blocks                   | 107.40         | 10.05 | 104.02      | 11.80 | 0.180    | 110.33          | 12.47 | 101.85      | 12.64 | 0.001*   | 106.21       | 13.20 |
| <b>Trail Making Task</b> |                |       |             |       |          |                 |       |             |       |          |              |       |
| Letter Number Switching  | 11.92          | 2.30  | 10.87       | 2.97  | 0.085    | 12.26           | 2.41  | 10.34       | 3.27  | 0.002*   | 11.29        | 3.02  |

223

224 ML, monolingual; BL bilingual; \*  $p < 0.01$ .

225

226

227 **Second language proficiency as a continuous variable across all older adults**

228 The quantity and quality of exposure to multiple languages is extremely variable across  
 229 individuals, and most have at least some experience with a second language. A recent study  
 230 reported that more than 80% of nearly 1,000 respondents in the United Kingdom who claimed to  
 231 be monolingual English-speakers had learned other languages at some point in their lives,  
 232 sometimes to high degrees of fluency (Castro et al., 2022). Previous behavioural research has  
 233 implicated the active use and proficiency of a second language as the critical factor that might  
 234 contribute most to CR in bilingual older adults (Calabria et al., 2020). In addition to the  
 235 composite score, the LSBQ quantifies second language proficiency based on a factor analysis,  
 236 which produced a latent variable comprising clustered items that were identified as representing

237 second language proficiency. The eigenvalue from this latent variable is used as the quantitative  
238 measure of second language proficiency (for details, see ref. 59). Thus, an important subscale of  
239 the LSBQ is second language proficiency, on which individual participants vary along a  
240 continuum (John A. E. Anderson et al., 2018). To test the hypothesis that second language  
241 proficiency is a key factor that contributes to CR in bilingualism, we correlated normalized  
242 scores on this factor with normalized measures of neuroanatomical and intrinsic functional  
243 network integrity across our entire sample of 93 older adults included in the study.

244

#### 245 **Monolingual adults have higher grey matter density in a core hub of the DMN**

246 To test the hypothesis that monolingual older adults will have higher neuroanatomical  
247 integrity than bilinguals when the groups are equated on cognitive performance, we quantified  
248 grey matter density across the brain using VBM analysis (FSL-VBM software suite) of T1-  
249 weighted structural MRI images. This analysis identified a large cluster in the posterior cingulate  
250 cortex (pCC), a core hub of the DMN (Buckner et al., 2009; Hagmann et al., 2008; van Oort et  
251 al., 2014), that showed higher grey matter density in monolingual older adults relative to the  
252 bilinguals [ $p < 0.05$ , cluster corrected for multiple comparisons using ETAC (Cox, 2019)] (Fig.  
253 1a-b). Moreover, grey matter density in the pCC was negatively correlated with second language  
254 proficiency across the entire sample of older adults ( $r = -0.30$ ;  $p = 0.002$ , 2-tailed; Fig. 1c).

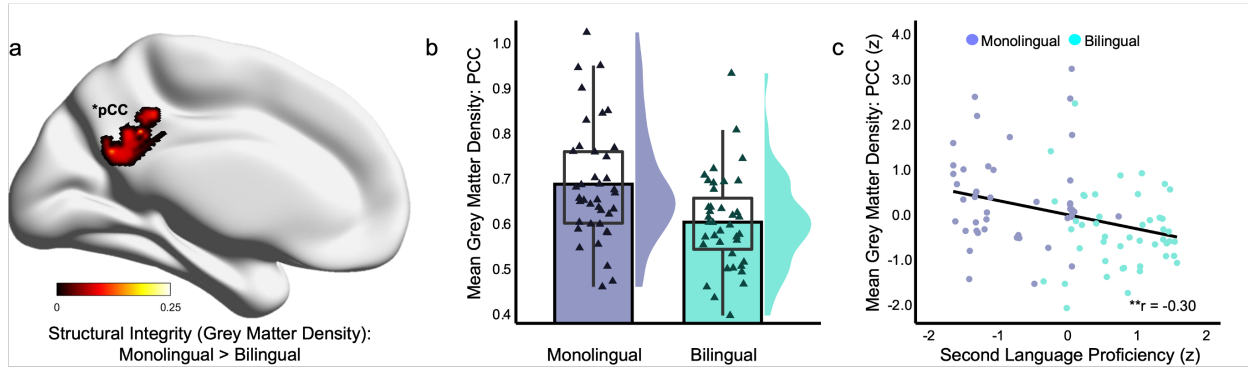

255

256 **Figure 1.** Differences in structural integrity estimated using VBM. (a) Comparing groups  
257 matched on cognitive performance using PSM, monolinguals have higher grey matter density  
258 than bilinguals in the posterior cingulate cortex, a hub of the DMN ( $p < 0.05$ , ETAC corrected;  
259 cluster centre of mass:  $x = -3$ ,  $y = -50$ ,  $z = 30$ , mni\_152 coordinates). (b) Mean grey matter  
260 density in the pCC cluster showing a significant difference between the matched groups (solid  
261 bars); distribution of values for all participants (triangles) overlaid with the first and third  
262 quartiles (box), interquartile range (whiskers), and density curve for each group. (c) Across all  
263 older adults ( $n = 93$ ), second language proficiency is negatively correlated with grey matter  
264 density in the pCC ( $r = -0.30$ ;  $p = 0.002$ , 2-tailed). pCC, posterior cingulate cortex; DMN,  
265 default mode network;  $z$ , standardized scores; \*  $p < 0.05$ ; \*\*  $p < 0.01$ .

266

## 267 **Monolingual older adults show greater default-executive coupling, with stronger RSFC** 268 **between a FPCN hub node and the DMN**

269 To test the hypothesis that bilingual older adults will show preserved intrinsic functional network  
270 integrity, despite lower neuroanatomical integrity, we used RSFC analysis to investigate within-  
271 and between-network connectivity among the nodes of three foundational large-scale networks –  
272 the FPCN, DMN, and DAN. The locations of 43 network nodes across these 3 networks were  
273 based on previous work that identified and characterized these networks based on both task-  
274 related and resting-state fMRI data (Spreng et al., 2013). The full matrices of the group means  
275 for all pairwise correlations between nodes for the monolingual and bilingual groups were  
276 calculated, and the latter subtracted from the former to produce the group difference matrix  
277 (Supplementary Fig. 2). The upper half of the matrix shows the group difference in mean  
278 pairwise correlation values; the lower half of the matrix is thresholded to show only the

279 statistically significant differences (permutation test:  $q < 0.05$ , FDR-corrected for multiple  
280 comparisons across the entire matrix). Significant differences in RSFC between the monolingual  
281 and bilingual groups were highly specific and consistent with our hypotheses, with the  
282 monolinguals showing stronger RSFC between the aMFG in the left prefrontal cortex (PFC) and  
283 multiple nodes of the DMN only, including dorsomedial PFC, pCC, left posterior inferior  
284 parietal cortex, left superior frontal gyrus, left superior temporal sulcus, and ventromedial PFC  
285 (Fig. 2a,b). Mean RSFC between the aMFG and each of the 6 DMN nodes was also negatively  
286 correlated with second language proficiency across the entire sample of older adults ( $r = -0.29$ ;  $p$   
287  $= 0.005$ , 2-tailed; Fig. 2c).

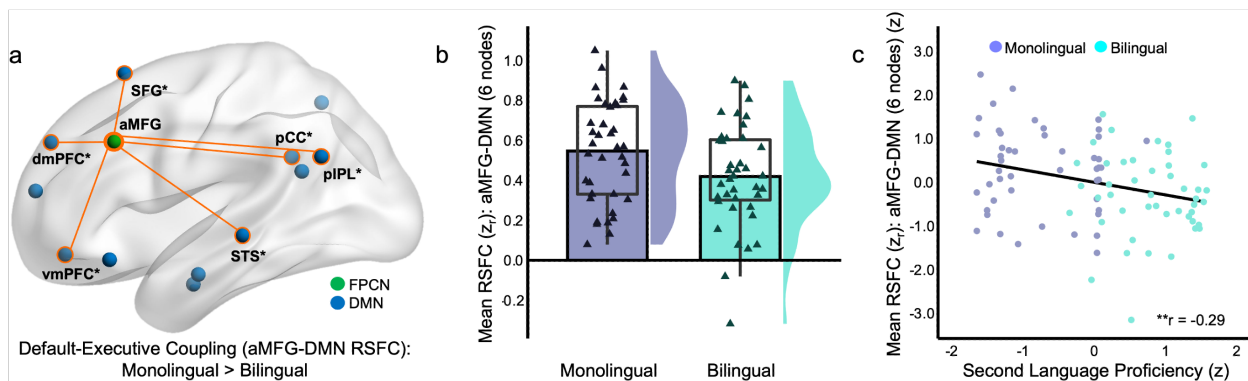

288

289 **Figure 2.** Differences in functional integrity estimated using RSFC. (a) Monolingual older adults  
290 show stronger RSFC of the left aMFG with multiple nodes of the DMN only (i.e., default-  
291 executive coupling), relative to bilinguals, including the dmPFC, pCC, left IPL, left SFG, left  
292 STS, and vmPFC ( $p < 0.05$  FDR corrected for all pairwise correlations among all 43 nodes of the  
293 FPCN, DMN, and DAN) displayed on a glass brain representation of left hemisphere (see also  
294 Supplementary Fig. 2); orange lines/circles indicate significantly stronger pairwise RSFC in the  
295 monolingual older adults. (b) Mean RSFC between the aMFG and each of the 6 DMN nodes  
296 showing a significant difference between the matched groups (solid bars); distribution of values  
297 for all participants (triangles) overlaid with the first and third quartiles (box), interquartile range  
298 (whiskers), and density curve for each group. (c) Across all older adults ( $n=93$ ), second language  
299 proficiency is negatively correlated with mean RSFC between the aMFG and the 6 nodes of the  
300 DMN ( $r = -0.29$ ;  $p = 0.005$ , 2-tailed). FPCN, frontoparietal control network; DMN, default mode  
301 network; RSFC, resting-state functional connectivity;  $z_r$ , Fisher  $z$ -transformed correlation;  $z$ ,  
302 standardized score; for full list of all node label definitions, see Supplementary Table 1. \*  $p <$   
303  $0.05$ ; \*\*  $p < 0.01$ .

304

305 Note that this pattern of increased functional connectivity between the MFG and DMN (i.e.,  
306 default-executive coupling) is a hallmark characteristic of neurocognitive aging; it is associated  
307 with an inability to disengage the DMN during externally focussed tasks [task-related fMRI  
308 (Spreng and Schacter, 2012; Turner and Spreng, 2015)] and an increased reliance on semantic  
309 memory in the context of episodic memory decline (Spreng and Turner, 2019).

310 To further explore the extent of increased RSFC of the aMFG with the DMN, we used graph  
311 theory analysis to quantify the clustering coefficient of the aMFG with all nodes of DMN across  
312 the entire brain (see Fig. 3a for illustration of clustering calculation, displayed in the left  
313 hemisphere). The monolingual group showed significantly higher clustering of the aMFG with  
314 the whole DMN than the bilingual group (mean difference = 0.20; permutation test:  $p = 0.04$ , 2-  
315 tailed) (Fig. 3b). Furthermore, clustering of the aMFG with the DMN was negatively correlated  
316 with second language proficiency across the entire sample of older adults ( $r = -0.22$ ;  $p = 0.03$ , 2-  
317 tailed; Fig. 3c).

318



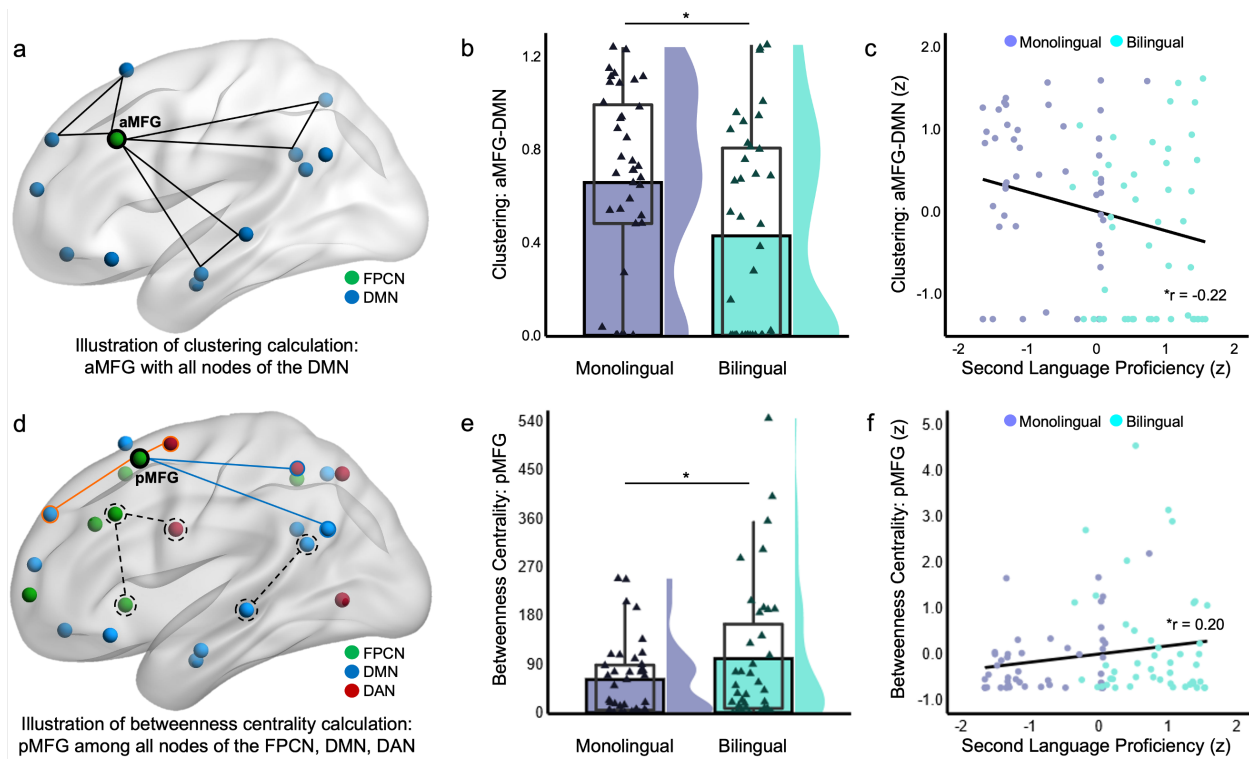

319

320 **Figure 3.** Differences in functional integrity estimated using graph theory analyses of RSCF. (a)  
 321 Illustration of clustering coefficient calculation: number of complete triangles between the  
 322 aMFG, a provincial hub of the FPCN, and every unique pair of nodes in the DMN, where  
 323 triangle-sides (black lines) indicate statistically significant RSFC between nodes at a given  
 324 density threshold. Illustration shows hypothetical clustering at a given threshold, displayed on a  
 325 glass brain representation of the left hemisphere. (b) Monolingual older adults had higher  
 326 clustering of the left aMFG with the DMN than bilinguals (mean clustering coefficient difference  
 327 = 0.20; permutation test:  $p = 0.04$ , 2-tailed). Plot shows mean clustering coefficient (area under  
 328 the curve) for each of the matched groups (solid bars); distribution of values for all participants  
 329 (triangles) overlaid with the first and third quartiles (box), interquartile range (whiskers), and  
 330 density curve for each group. (c) Across all older adults ( $n = 93$ ), second language proficiency is  
 331 negatively correlated with clustering of the aMFG with the DMN ( $r = -0.22$ ;  $p = 0.03$ , 2-tailed).  
 332 (d) Illustration of betweenness centrality calculation: number of shortest pairwise paths for all  
 333 possible node-pairs among the 43 nodes of the FPCN, DMN, and DAN that pass through the left  
 334 pMFG, a connector node of the FPCN. Illustration shows two shortest pairwise paths (solid  
 335 lines) for 2 node-pairs (circled in orange and blue) that pass through the pMFG, and two shortest  
 336 pairwise paths that do not (dashed black lines/circles). (e) Monolingual older adults had lower  
 337 betweenness centrality of the left pMFG than monolinguals (mean difference = -45.06;  
 338 permutation test:  $p = 0.04$ , 2-tailed). Plot shows mean betweenness centrality for each of the  
 339 matched groups (solid bars); distribution of values for all participants (triangles) overlaid with  
 340 the first and third quartiles (box), interquartile range (whiskers), and density curve for each  
 341 group. (c) Across all older adults ( $n = 93$ ), second language proficiency is positively correlated  
 342 with betweenness centrality of the pMFG ( $r = 0.20$ ;  $p = 0.04$ , 2-tailed). aMFG, anterior middle  
 343 frontal gyrus; pMFG, posterior middle frontal gyrus; FPCN, frontoparietal control network;



344 DMN, default mode network; DAN, dorsal attention network; RSFC, resting-state functional  
345 connectivity;  $z$ , standardized score. \*  $p < 0.05$ .  
346

### 347 **Bilingual older adults have higher betweenness centrality of a connector node of the FPCN**

348 The FPCN facilitates control over one's locus of attention by flexibly alternating its coupling  
349 between the DMN and DAN during internally vs. externally focussed cognition, respectively  
350 (Spreng et al., 2010). Previous work identified a key connector node of the FPCN in the pMFG  
351 with very high betweenness centrality, a graph theory analysis metric that quantifies the extent to  
352 which a node contributes to cross-network communication; thus, this node is thought to play a  
353 critical role in cognitive flexibility (Spreng et al., 2013). To assess potential differences in the  
354 flexibility of cross-network communication in monolingual vs. bilingual older adults, we  
355 compared the betweenness centrality of the pMFG (see Fig. 3d for illustration of betweenness  
356 centrality calculation, displayed in the left hemisphere) between the two groups. Bilingual older  
357 adults showed higher betweenness centrality of the pMFG than the monolinguals (mean  
358 difference = -45.06; permutation test:  $p = 0.04$ , 2-tailed; Fig. 3e). Finally, betweenness centrality  
359 of the pMFG was positively correlated with second language proficiency across the entire  
360 sample of older adults ( $r = 0.20$ ;  $p = 0.04$ , 2-tailed; Fig. 3f).

361

### 362 **Discussion**

363 Here, we demonstrate that when equated on cognitive performance using a rigorous matching  
364 procedure, bilingual older adults had lower grey matter density than their monolingual peers in  
365 the pCC, a hub of the DMN, which is particularly susceptible to structural and functional decline  
366 in aging and neurodegenerative disease (e.g., Alzheimer's disease) (Buckner, 2005; Grady et al.,  
367 2006; Lustig et al., 2003). This finding confirms that lifelong bilingualism is a CR factor, as it

368 demonstrates that bilingual older adults perform just as well as their monolingual peers on tasks  
369 of executive function despite showing signs of more advanced neuroanatomical aging. In  
370 contrast, the bilingual older adults had preserved intrinsic functional network structure, related to  
371 executive function and cognitive flexibility specifically, more consistent with that of younger  
372 brains (Spreng et al., 2013) than their monolingual peers. While the monolingual older adults  
373 showed more prominent coupling of a hub node (aMFG) of the FPCN with the DMN, a hallmark  
374 characteristic of advanced age associated with a shift from fluid to crystallized cognition (Spreng  
375 et al., 2018), the bilinguals showed higher betweenness centrality of a connector node of the  
376 FPCN (pMFG), thought to underly cognitive flexibility (Spreng et al., 2013). Moreover, across  
377 all older adults, second language proficiency was negatively correlated with structural integrity,  
378 but positively correlated with multiple measures of intrinsic functional network integrity. These  
379 findings confirm that lifelong bilingualism, and second language proficiency in particular,  
380 contribute to CR, and support our hypotheses that this occurs through a process of bolstering the  
381 functional integrity, and maintaining neurocognitive flexibility, of the FPCN. Thus, a neural  
382 mechanism underlying CR in bilingualism is the experience-dependent maintenance of optimal  
383 intrinsic functional network structure in the face of neuroanatomical changes across the lifespan.  
384

385 Several studies have investigated the possibility that lifelong bilingualism could lead to the  
386 preservation of, and/or compensatory increases in, the brain's neuroanatomical structure by  
387 investigating white matter integrity using diffusion tensor imaging MRI. While some studies  
388 reported higher white matter integrity associated with bilingualism in older adults (John A.E.  
389 Anderson et al., 2018; Luk et al., 2011; Marin-Marín et al., 2020; Olsen et al., 2015), others  
390 reported prominent widespread declines in white matter integrity (Anderson et al., 2021; Brian T.

391 Gold et al., 2013; Schweizer et al., 2012). A lack of consensus on the potential role of  
392 experience-dependent plasticity of brain structure in CR underscores the need for more research  
393 in this area using rigorous matching techniques to compare monolingual vs. bilingual groups –  
394 i.e., to delineate neuroanatomical differences associated with bilingualism per se, groups must be  
395 equated on cognitive performance (Anderson et al., 2021; John A. E. Anderson et al., 2018). One  
396 study that did this provided evidence of a more nuanced relationship between lifelong  
397 bilingualism and brain structural integrity in older adults. Cognitively healthy bilingual older  
398 adults had lower structural integrity of both grey and white matter globally, relative to  
399 monolinguals, but the bilinguals also had higher white and grey matter integrity within focal  
400 regions putatively involved in executive cognitive function specifically (Anderson et al., 2021).

401  
402 Research has also investigated the possibility that differences in the way brain regions are  
403 engaged during task performance between monolingual and bilingual older adults could underlie  
404 or be a consequence of CR. Monolingual older adults show increased engagement of frontal  
405 brain regions or circuits reflective of increased cognitive effort at lower levels of task difficulty  
406 than bilingual adults, akin to differences between older and younger adults, respectively (Grundy  
407 et al., 2017). For example, monolingual older adults, despite having higher overall grey and  
408 white matter integrity than bilinguals, performed worse on a 2-back working memory task, and  
409 showed increased engagement of a frontostriatal circuit, including the left MFG in particular,  
410 during task performance (Anderson et al., 2021). Decreased task-related activation of frontal  
411 brain regions in bilingual older adults has been interpreted as increased efficiency (Grundy et al.,  
412 2017). However, the underlying structural or functional properties that could facilitate this more  
413 efficient task-related processing under certain task conditions have not been determined. We

414 propose that intrinsic functional network connectivity – which is bolstered by task-related  
415 activity over time, which in turn facilitates future task performance – underlies the more efficient  
416 dynamic neurocognitive processing in bilingual older adults measured at the task-level.

417

418 Previous studies using fMRI to investigate potential differences in RSFC associated with  
419 bilingualism (Berken et al., 2016; Dash et al., 2022; DeLuca et al., 2019; Grady et al., 2015;  
420 Gullifer et al., 2018; Li et al., 2015; Luk et al., 2011; Marin-Marín et al., 2021; Thieba et al.,  
421 2019) have typically focussed on younger adults only, had small sample sizes, and/or failed to  
422 explicitly or adequately account for cognitive performance or neuroanatomical differences across  
423 groups of older individuals, complicating interpretations and limiting inferences about how  
424 observed changes are associated with CR per se. Nevertheless, our results are broadly consistent  
425 with previous work reporting increased RSFC primarily among regions involved in cognitive  
426 control (Grady et al., 2015) and attention networks specifically (Dash et al., 2022), in older  
427 bilingual adults. Previous work has also investigated differences in RSFC associated with  
428 various other CR factors across the lifespan (Anthony and Lin, 2018; Benson et al., 2018; Chan  
429 et al., 2021, 2018; N. Franzmeier et al., 2017; Nicolai Franzmeier et al., 2017a; Pietzuch et al.,  
430 2019; Stern et al., 2021; Weiler et al., 2018). One study demonstrated that level of education, as  
431 a proxy for CR, was positively correlated with increased RSFC between a left PFC region of the  
432 FPCN and the DAN, and negatively correlated with RSFC of this region with the DMN, in older  
433 adults with mild cognitive impairment (Nicolai Franzmeier et al., 2017b). The latter result  
434 parallels our findings of a negative correlation between second language proficiency and RSFC  
435 of the FPCN (aMFG) with the DMN, and increased RSFC between these regions in monolingual  
436 older adults, relative to bilinguals. This suggests that our discovery of the critical role of left

437 MFG connectivity with other networks in CR associated with bilingualism might generalize to  
438 other CR factors as well, a hypothesis that should be investigated in future work using the  
439 analyses described here.

440

441 How could bilingualism have a long-term influence on RSFC of intrinsic functional networks?  
442 Managing multiple simultaneously active languages (Kroll et al., 2012; van Heuven et al., 2008)  
443 requires dynamically alternating the locus of one's attention between the external environment,  
444 to monitor the situationally relevant language, and the content of one's internal mental  
445 environment. Age-related memory declines are due, in part, to distraction resulting from a  
446 reduced ability to ignore task-irrelevant information (Healey et al., 2008; Stevens et al., 2008).  
447 Task-related modulation of functional connectivity of lateral PFC is critical for suppressing task-  
448 irrelevant processing in the brain (Zanto et al., 2011), which is reduced in older adults compared  
449 to young adults (Gazzaley et al., 2005). Moreover, task-related functional connectivity of the left  
450 lateral PFC with DMN regions specifically has been associated with memory failure in older  
451 adults due to an inability to ignore distraction (Stevens et al., 2008). The latter is consistent with  
452 research demonstrating that, unlike young adults, older adults "fail to deactivate" the DMN  
453 during externally focussed cognition (Grady et al., 2006; Lustig et al., 2003; Miller et al., 2008),  
454 and that this failure is associated with persistent functional connectivity of the DMN with the  
455 FPCN (Spreng and Schacter, 2012; Spreng and Turner, 2019; Turner and Spreng, 2015). Taken  
456 together, these results suggest that lateral PFC regions involved in cognitive control play a role in  
457 age-related differences in selective attention due to 1) reduced dynamic flexibility of functional  
458 connectivity with other brain regions/networks generally, and 2) persistent functional  
459 connectivity with the DMN, specifically. These task-related differences in older adults mirror

460 age-related differences in intrinsic RSFC (Grady et al., 2016; Spreng et al., 2018), demonstrated  
461 most prominently by the monolingual older adults in this study, who showed lower cross-  
462 network RSFC of a connector node of the FPCN, and stronger RSFC of a hub node of the FPCN  
463 with the DMN. Previous work demonstrated that age-related differences in functional  
464 connectivity of the FPCN with other networks during both task and rest predicted cognitive  
465 performance (Grady et al., 2016). Thus, the differences reported here between monolingual and  
466 bilingual older adults in cross-network RSFC of two key nodes of the FPCN (aMFG and pMFG)  
467 could account for the preservation of cognitive function in bilinguals in the face of more  
468 advanced neuroanatomical aging, relative to monolinguals.

469

470 Younger looking patterns of RSFC in the bilingual older adults could be the consequence of a  
471 long history of increased demand on the FPCN to facilitate attentional control. Metaphorically,  
472 just as targeted physical exercise builds specific muscles of the body needed to optimize physical  
473 performance over time, “mental exercise” may strengthen RSFC among specific brain regions  
474 needed to optimize cognitive performance. Experience-dependent changes in RSFC are highly  
475 specific to the brain regions engaged during task performance (Albert et al., 2009; Lewis et al.,  
476 2009; Stevens et al., 2010; Tambini et al., 2010). Further, the magnitude of experience-  
477 dependent changes in RSFC predicts the degree of improvement in future task performance  
478 (Lewis et al., 2009; Stevens et al., 2010; Tambini et al., 2010). Thus, the pattern of preserved  
479 RSFC of the FPCN hub and connector nodes in the brains of bilingual older adults is highly  
480 consistent with the pattern of task-evoked activity that facilitates domain-general attentional  
481 control, needed to cognitively manage multiple languages simultaneously.

482

483 Recent work sought to identify a RSFC connectome associated with cognitive reserve using a  
484 data-driven approach, which could be useful as a direct measure of cognitive reserve and a  
485 potential outcome measure for interventions aimed at improving CR (Stern et al., 2021). The  
486 pattern of RSFC identified was correlated with IQ, and notably, included primarily frontal brain  
487 regions. Indeed, understanding the factors that give rise to CR and its underlying neural  
488 mechanism(s) is an important endeavour, with broad implications ranging from the level of the  
489 individual to society. For example, a recent large-scale longitudinal study demonstrated  
490 relationships between educational attainment, RSFC of the brain's functional networks, and  
491 neurocognitive health in older age (Chan et al., 2021). In general, older adults show reduced  
492 within-network RSFC and increased between-network RSFC relative to young adults, reflecting  
493 a widespread pattern of dedifferentiation [also referred to as reduced segregation (Wig, 2017)] of  
494 functional network organization broadly (Chan et al., 2014; Geerligts et al., 2015; Grady et al.,  
495 2016; Setton et al., 2022; Spreng et al., 2016). This effect of aging is more prominent in older  
496 adults without a college degree than their college-educated peers, and predicts impending  
497 progression of dementia up to a decade later (Chan et al., 2021).

498

499 Our results are generally consistent with previous work described above reporting large-scale  
500 network dedifferentiation in aging and widespread, somewhat non-specific differences in  
501 patterns of RSFC associated with CR (e.g., education and IQ). Importantly, however, our results  
502 further delineate the specific processes that lead to network-wide changes at the level of  
503 individual network nodes, revealing their dissociable roles in maintaining within- and between-  
504 network communication in the context of a well-established CR factor – bilingualism. Notably,  
505 the pattern of cross-network functional connectivity of MFG regions that was more prominent in

506 bilingual older adults and correlated with second language proficiency in the current study is the  
507 reverse of the pattern associated with the well-established shift from fluid to crystallized  
508 cognition in typical aging (Spreng and Turner, 2019). Therefore, our findings highlight the  
509 critical roles of specific brain regions – i.e., discrete nodes of the FPCN within the MFG – in  
510 maintaining domain-general attentional control in aging, and suggest the intriguing possibility  
511 that the pattern of RSFC of these regions associated with bilingualism could be a neural  
512 mechanism underlying multiple CR factors. Understanding these factors is critical for informing  
513 personal lifestyle choices and policy decisions in an increasingly older global population.

514

## 515 **Materials and Methods**

### 516 **Participants**

517 Ninety-three participants (age: mean  $\pm$  SD = 74.04  $\pm$  3.86, range = 68-85; 63 female) were  
518 recruited from the local area surrounding Toronto, Ontario, Canada; each participant was a  
519 resident of Canada at the time of testing. All participants were right-handed and had no history of  
520 heart disease, neurological or psychological disorders, or traumatic brain injuries. Data from a  
521 subset of these participants were analyzed in previous work (Anderson et al., 2021; John A.E.  
522 Anderson et al., 2018). An additional 3 participants were recruited but to ensure data quality,  
523 these participants were excluded from analyses due to head motion in the MRI scanner  
524 exceeding 3mm in one or both of the resting-state fMRI runs.

525

526 The Language and Social Background Questionnaire [LSBQ (John A. E. Anderson et al., 2018)]  
527 was used to categorize participants as monolingual or bilingual. Participants were interviewed  
528 via telephone to validate bilingual status, and those who could not be reliably identified as either



529 monolingual or bilingual were not included in the study. Of the 93 participants analyzed, 47  
530 participants (29 female) were identified as bilingual and 46 (34 female) were identified as  
531 monolinguals. All participants completed the Mini-Mental State Examination [MMSE (Folstein  
532 et al., 1975)] and D-KEFS battery (Delis et al., 2001). The D-KEFS is a well-established battery  
533 that assesses a comprehensive variety of cognitive processes related to executive control.

534

### 535 **Propensity Score Matching**

536 Interpreting group differences in brain structure and function related to cognitive reserve requires  
537 that monolingual and bilingual groups have an equivalent level of cognitive functioning.

538 Therefore, in the current study, monolinguals and bilinguals were matched on multiple  
539 neuropsychological and demographic variables using propensity-score matching (PSM). A  
540 propensity score for each individual was obtained by using logistic regression to predict group  
541 membership given a set of observed covariates. Participants from one group were then matched  
542 to those in the second group based on the propensity scores (Rosenbaum and Rubin, 1983).

543 Nearest neighbour matching was used to match the propensity scores of individuals between  
544 groups. PSM accounts for multivariate interaction, minimizes selection error when using a large  
545 number of matching variables, and is well-suited for smaller sample sizes that are usually found  
546 in neuroimaging studies (Austin and Steyerberg, 2015; Ho et al., 2007; Rosenbaum and Rubin,  
547 1983).

548

549 To prioritize matching the monolingual and bilingual groups on cognitive performance, PSM  
550 was done using the MatchIt R package (Ho et al., 2011) in a 2-stage hierarchical manner. The  
551 first level matched the groups on 4 neuropsychological measures: MMSE, Trail Making Task

552 (letter-number-switching score), Shipley-2 verbal score, and Shipley-2 block patterns score  
553 Using the propensity scores, each bilingual participant was matched to a monolingual; bilinguals  
554 that could not be matched, and any remaining monolinguals, were removed from the matched-  
555 group analyses. Once the groups were matched on cognitive performance, they were then  
556 matched on 3 demographic variables using the same procedure: age, education, and sex. The  
557 final group sizes were 39 monolinguals (age: mean  $\pm$  SD = 73.51  $\pm$  3.25, range = 68-79; 30  
558 female) and 39 bilinguals (age: mean  $\pm$  SD = 73.87  $\pm$  4.00, range = 69-83; 23 female).

559

### 560 **MRI Data Acquisition**

561 MRI data were collected in Toronto, Ontario, Canada at York University using a Siemens Trio  
562 3T scanner with a 32-channel head coil. For each participant, a high-resolution T1-weighted  
563 anatomical scan was acquired (TR = 1.9 s, TE = 2.52 ms, 192 axial slices, slice thickness = 1  
564 mm, field of view (FOV) = 256 mm, 256 x 256 acquisition matrix). After the anatomical scan,  
565 participants completed two six-minute, multi-echo “resting-state” functional scans, wherein  
566 participants were instructed to remain still in the scanner while visual maintaining fixation on a  
567 cross (TR = 3 s, TE = 14 ms, 30 ms, 46 ms, flip angle = 83°, 43 axial slices, FOV = 216 mm,  
568 voxel size = 3 mm isotropic).

569

### 570 **Voxel-Based Morphometry**

571 To assess differences in grey matter integrity, voxel-based morphometry (VBM) was conducted  
572 using the FSL-VBM software suite (Douaud et al., 2007; Smith et al., 2004). T1-weighted  
573 structural images were brain-extracted (BET) to remove skull. Next, tissue-type segmentation  
574 was conducted (FAST4) to quantify grey matter density at the voxel-wise level across the whole

575 brain for each participant. Grey matter images were normalized to a study-specific grey matter  
576 template through a two-step process. First, all grey matter volume images were non-linearly  
577 aligned to the MNI\_152 grey matter template and averaged to create a study specific grey matter  
578 template; second, the native-space grey matter image for each participant was non-linearly  
579 aligned to the study specific template (FNIRT). The registered grey matter images were  
580 corrected for local expansion or contraction (caused by the non-linear component of the spatial  
581 transformation) by dividing by the Jacobian of the warp field. The modulated images were then  
582 smoothed with an isotropic Gaussian kernel of 3 mm full width at half maximum (FWHM).  
583 Group differences in grey matter density were determined using voxel-wise *t*-tests (3dttest++) in  
584 Analysis of Functional Neuroimages [AFNI (Cox, 1996)] with  $\alpha < 0.05$ ; correction for  
585 multiple comparisons was done using the AFNI non-parametric equitable thresholding and  
586 clustering (ETAC) method (Cox, 2019), with 10 voxel-wise *p*-thresholds ranging from  $p = 0.01$   
587 to  $p = 0.001$ . To calculate the correlation between second language proficiency and grey matter  
588 density in the pCC across all participants ( $n = 93$ ), a single significant cluster from the group  
589 analysis was used as a ROI; mean grey matter probability across all voxels within this ROI was  
590 calculated for each participant.

591

## 592 **fMRI Data Preprocessing**

593 Echo-planar images were preprocessed using the AFNI multi-echo independent component  
594 analysis (ME-ICA) processing pipeline (DuPre et al., 2021; Kundu et al., 2013, 2012). For each  
595 echo of both resting-state runs, any large transient spikes of activity were identified and removed  
596 via interpolation (3dDespike). Data were then slice-time corrected (3dTshift) and aligned to the  
597 initial volume (3dVolreg). ME-ICA (tedana) was conducted to further remove noise components

598 related to motion and physiological artifacts (Kundu et al., 2013, 2012). The combination of  
599 multi-echo fMRI and ME-ICA has been shown to be more effective at removing spurious noise  
600 sources than conventional methods (Power et al., 2018). This denoising technique leverages the  
601 TE-dependence of the transverse relaxation rate,  $R_2^*$ ; almost all fMRI signal, regardless of  
602 origin, can be expressed as some combination of  $R_2^*$ , and initial signal intensity,  $S_0$  (Wu and Li,  
603 2005). All echoes are combined and analyzed using ICA to determine the degree to which  
604 independent components were associated with  $R_2^*$  changes. Components highly associated with  
605  $R_2^*$  mechanisms were identified as BOLD signal components, whereas weakly associated  
606 components were identified as noise and removed (Kundu et al., 2013, 2012). The effectiveness  
607 of ME-ICA denoising obviates the need for global signal regression (Spreng et al., 2019). Data  
608 for each run were then smoothed with an isotropic Gaussian kernel of 6 mm FWHM  
609 (3dBlurInMask) and mean-scaled. Finally, the 2 scaled runs were concatenated and transformed  
610 into a study specific MNI\_152-template space (@auto\_t1rc).

611

## 612 **Resting-State Functional Connectivity**

613 Coordinates for all nodes of the DMN, FPC, and DAN were obtained from a previous study that  
614 identified and characterized these network-nodes based on both task-related and resting-state  
615 fMRI data; nodes were assigned network labels corresponding to their “rest network affiliation”  
616 (Spreng et al., 2013). For each participant, nodes were defined by spherical regions of interest  
617 (ROIs) with a radius of 6 mm centered on the *a priori* coordinates. To quantify resting-state  
618 functional connectivity (RSFC), the mean BOLD signal time-series across all voxels within each  
619 node was extracted and pairwise Pearson correlation coefficients were calculated for all node-  
620 pairs and transformed to z-values using Fisher’s r-to-z transformation. This yielded a 43 by 43

621 node-wise correlation matrix for each participant. Significant differences in RSFC between the  
622 monolingual and bilingual groups were determined using permutation tests (1000 permutations)  
623 for every node-pair and false discovery rate correction (threshold:  $q < 0.05$ , FDR corrected) for  
624 multiple comparisons across the entire matrix.

625

### 626 **Graph Theoretic Analysis**

627 For each participant, a graph was constructed from the node-wise correlation matrix using the  
628 GraphVar software suite (Kruschwitz et al., 2015). To account for potential threshold effects, we  
629 calculated graph metrics across a series of network densities (density range = 0.22-0.4). Two  
630 graph metrics were calculated and reported here: weighted local clustering coefficient and  
631 betweenness centrality. The weighted clustering coefficient of a node quantifies how tightly  
632 clustered a given node is with its immediate neighbours, while considering the weight of the  
633 connections; it is calculated as the sum of the weights of all closed triplets centered on a node at  
634 a given density, normalized by the sum of the weights of all possible triplets centered around that  
635 node. The betweenness centrality of a node is the number of shortest paths between all possible  
636 node-pairs that pass through the given node at a given density; betweenness centrality is a  
637 measure of the extent to which a node contributes to communication across networks, and thus  
638 can be used to identify main interconnector nodes (Rubinov and Sporns, 2010). Both metrics  
639 were normalized by calculating the mean area under the curve across the range of densities.  
640 Significant group differences were determined using permutation tests (1000 permutations).

641

### 642 **Brain-Behaviour Correlations**

643 Previous behavioural research has implicated the active use and proficiency of a second language  
644 as the critical factor having a positive effect on cognitive reserve (Calabria et al., 2020). Second  
645 language proficiency was previously quantified from the LSBQ. A factor analysis on all the  
646 LSBQ items identified a latent variable with clustered items representing second language  
647 proficiency. The eigenvalue from this factor was used as a subscale of the LSBQ to quantify the  
648 active use and proficiency of a second language (John A. E. Anderson et al., 2018). To determine  
649 if second language proficiency is related to structural and functional brain properties, we used  
650 Pearson correlation to quantify the relationship between second language proficiency and each of  
651 our brain measures across the entire group of 93 participants (age: mean  $\pm$  SD = 74.21  $\pm$  4.09,  
652 range = 68-85; 65 female). Second language proficiency was correlated with each of the  
653 following brain measures: PCC grey matter density, mean RSFC between the aMFG and the 6  
654 DMN nodes identified in the group comparison of the full correlation matrix (dmPFC, pCC, left  
655 IPL, left SFG, left STS, and vmPFC), clustering coefficient of the aMFG with the entire DMN,  
656 and betweenness centrality of the pMFG. The significance of the Pearson correlation was  
657 determined using two-tailed tests at  $\alpha < 0.05$ .

658 References

- 659 Abutalebi J, Della Rosa PA, Green DW, Hernandez M, Scifo P, Keim R, Cappa SF, Costa A.  
660 2012. Bilingualism Tunes the Anterior Cingulate Cortex for Conflict Monitoring. *Cereb*  
661 *Cortex* **22**:2076–2086. doi:10.1093/cercor/bhr287
- 662 Adelstein JS, Shehzad Z, Mennes M, Deyoung CG, Zuo X-N, Kelly C, Margulies DS,  
663 Bloomfield A, Gray JR, Castellanos FX, Milham MP. 2011. Personality is reflected in the  
664 brain’s intrinsic functional architecture. *PloS One* **6**:e27633.  
665 doi:10.1371/journal.pone.0027633
- 666 Albert NB, Robertson EM, Miall RC. 2009. The resting human brain and motor learning. *Curr*  
667 *Biol CB* **19**:1023–1027. doi:10.1016/j.cub.2009.04.028
- 668 Anderson John A.E., Grundy JG, De Frutos J, Barker RM, Grady C, Bialystok E. 2018. Effects  
669 of bilingualism on white matter integrity in older adults. *NeuroImage* **167**:143–150.  
670 doi:10.1016/j.neuroimage.2017.11.038
- 671 Anderson JAE, Grundy JG, Grady CL, Craik FIM, Bialystok E. 2021. Bilingualism contributes  
672 to reserve and working memory efficiency: Evidence from structural and functional  
673 neuroimaging. *Neuropsychologia* **163**:108071.  
674 doi:10.1016/j.neuropsychologia.2021.108071
- 675 Anderson JAE, Hawrylewicz K, Grundy JG. 2020. Does bilingualism protect against dementia?  
676 A meta-analysis. *Psychon Bull Rev* **27**:952–965. doi:10.3758/s13423-020-01736-5
- 677 Anderson John A. E., Mak L, Keyvani Chahi A, Bialystok E. 2018. The language and social  
678 background questionnaire: Assessing degree of bilingualism in a diverse population.  
679 *Behav Res Methods* **50**:250–263. doi:10.3758/s13428-017-0867-9
- 680 Anderson JAE, Saleemi S, Bialystok E. 2017. Neuropsychological Assessments of Cognitive  
681 Aging in Monolingual and Bilingual Older Adults. *J Neurolinguistics* **43**:17–27.  
682 doi:10.1016/j.jneuroling.2016.08.001
- 683 Anthony M, Lin F. 2018. A Systematic Review for Functional Neuroimaging Studies of  
684 Cognitive Reserve Across the Cognitive Aging Spectrum. *Arch Clin Neuropsychol Off J*  
685 *Natl Acad Neuropsychol* **33**:937–948. doi:10.1093/arclin/acx125
- 686 Austin PC, Steyerberg EW. 2015. The number of subjects per variable required in linear  
687 regression analyses. *J Clin Epidemiol* **68**:627–636. doi:10.1016/j.jclinepi.2014.12.014
- 688 Benson G, Hildebrandt A, Lange C, Schwarz C, Köbe T, Sommer W, Flöel A, Wirth M. 2018.  
689 Functional connectivity in cognitive control networks mitigates the impact of white  
690 matter lesions in the elderly. *Alzheimers Res Ther* **10**:109. doi:10.1186/s13195-018-0434-  
691 3
- 692 Berken JA, Chai X, Chen J-K, Gracco VL, Klein D. 2016. Effects of Early and Late  
693 Bilingualism on Resting-State Functional Connectivity. *J Neurosci* **36**:1165–1172.  
694 doi:10.1523/JNEUROSCI.1960-15.2016
- 695 Berkes M, Calvo N, Anderson JAE, Bialystok E, Alzheimer’s Disease Neuroimaging Initiative.  
696 2021. Poorer clinical outcomes for older adult monolinguals when matched to bilinguals  
697 on brain health. *Brain Struct Funct* **226**:415–424. doi:10.1007/s00429-020-02185-5
- 698 Bialystok E. 2021. Bilingualism: Pathway to Cognitive Reserve. *Trends Cogn Sci* **25**:355–364.  
699 doi:10.1016/j.tics.2021.02.003
- 700 Bialystok E. 2015. Bilingualism and the development of executive function: The role of  
701 attention. *Child Dev Perspect* **9**:117–121.



- 702 Bialystok E, Craik FIM. 2022. How does bilingualism modify cognitive function? Attention to  
703 the mechanism. *Psychon Bull Rev*. doi:10.3758/s13423-022-02057-5
- 704 Biswal B, Zerrin Yetkin F, Haughton VM, Hyde JS. 1995. Functional connectivity in the motor  
705 cortex of resting human brain using echo-planar mri. *Magn Reson Med* **34**:537–541.  
706 doi:10.1002/mrm.1910340409
- 707 Buckner RL. 2005. Molecular, Structural, and Functional Characterization of Alzheimer’s  
708 Disease: Evidence for a Relationship between Default Activity, Amyloid, and Memory. *J*  
709 *Neurosci* **25**:7709–7717. doi:10.1523/JNEUROSCI.2177-05.2005
- 710 Buckner RL, Sepulcre J, Talukdar T, Krienen FM, Liu H, Hedden T, Andrews-Hanna JR,  
711 Sperling RA, Johnson KA. 2009. Cortical Hubs Revealed by Intrinsic Functional  
712 Connectivity: Mapping, Assessment of Stability, and Relation to Alzheimer’s Disease. *J*  
713 *Neurosci* **29**:1860–1873. doi:10.1523/JNEUROSCI.5062-08.2009
- 714 Cabeza R, Albert M, Belleville S, Craik FIM, Duarte A, Grady CL, Lindenberger U, Nyberg L,  
715 Park DC, Reuter-Lorenz PA, Rugg MD, Steffener J, Rajah MN. 2018. Maintenance,  
716 reserve and compensation: the cognitive neuroscience of healthy ageing. *Nat Rev*  
717 *Neurosci* **19**:701–710. doi:10.1038/s41583-018-0068-2
- 718 Calabria M, Hernández M, Cattaneo G, Suades A, Serra M, Juncadella M, Reñé R, Sala I, Lleó  
719 A, Ortiz-Gil J, Ugas L, Ávila A, Ruiz IG, Ávila C, Costa A. 2020. Active bilingualism  
720 delays the onset of mild cognitive impairment. *Neuropsychologia* **146**:107528.  
721 doi:10.1016/j.neuropsychologia.2020.107528
- 722 Campbell KL, Grady CL, Ng C, Hasher L. 2012. Age differences in the frontoparietal cognitive  
723 control network: Implications for distractibility. *Neuropsychologia* **50**:2212–2223.  
724 doi:10.1016/j.neuropsychologia.2012.05.025
- 725 Castro S, Wodniecka Z, Timmer K. 2022. Am I truly monolingual? Exploring foreign language  
726 experiences in monolinguals. *PloS One* **17**:e0265563. doi:10.1371/journal.pone.0265563
- 727 Chan MY, Han L, Carreno CA, Zhang Z, Rodriguez RM, LaRose M, Hassenstab J, Wig GS.  
728 2021. Long-term prognosis and educational determinants of brain network decline in  
729 older adult individuals. *Nat Aging* **1**:1053–1067. doi:10.1038/s43587-021-00125-4
- 730 Chan MY, Na J, Agres PF, Savalia NK, Park DC, Wig GS. 2018. Socioeconomic status  
731 moderates age-related differences in the brain’s functional network organization and  
732 anatomy across the adult lifespan. *Proc Natl Acad Sci* **115**. doi:10.1073/pnas.1714021115
- 733 Chan MY, Park DC, Savalia NK, Petersen SE, Wig GS. 2014. Decreased segregation of brain  
734 systems across the healthy adult lifespan. *Proc Natl Acad Sci* **111**.  
735 doi:10.1073/pnas.1415122111
- 736 Cox RW. 2019. Equitable Thresholding and Clustering: A Novel Method for Functional  
737 Magnetic Resonance Imaging Clustering in AFNI. *Brain Connect* **9**:529–538.  
738 doi:10.1089/brain.2019.0666
- 739 Cox RW. 1996. AFNI: Software for Analysis and Visualization of Functional Magnetic  
740 Resonance Neuroimages. *Comput Biomed Res* **29**:162–173. doi:10.1006/cbmr.1996.0014
- 741 Craik FIM, Bialystok E. 2006. Cognition through the lifespan: mechanisms of change. *Trends*  
742 *Cogn Sci* **10**:131–138. doi:10.1016/j.tics.2006.01.007
- 743 Dash T, Joannette Y, Ansaldo AI. 2022. Exploring attention in the bilingualism continuum: A  
744 resting-state functional connectivity study. *Brain Lang* **224**:105048.  
745 doi:10.1016/j.bandl.2021.105048
- 746 Delis DC, Kaplan E, Kramer JH. 2001. Delis-Kaplan executive function system. *Psychol Corp.*



- 747 DeLuca V, Rothman J, Bialystok E, Pliatsikas C. 2019. Redefining bilingualism as a spectrum of  
748 experiences that differentially affects brain structure and function. *Proc Natl Acad Sci*  
749 **116**:7565–7574. doi:10.1073/pnas.1811513116
- 750 Douaud G, Smith S, Jenkinson M, Behrens T, Johansen-Berg H, Vickers J, James S, Voets N,  
751 Watkins K, Matthews PM, James A. 2007. Anatomically related grey and white matter  
752 abnormalities in adolescent-onset schizophrenia. *Brain* **130**:2375–2386.  
753 doi:10.1093/brain/awm184
- 754 DuPre E, Salo T, Ahmed Z, Bandettini P, Bottenhorn K, Caballero-Gaudes C, Dowdle L,  
755 Gonzalez-Castillo J, Heunis S, Kundu P, Laird A, Markello R, Markiewicz C, Moia S,  
756 Staden I, Teves J, Uruñuela E, Vaziri-Pashkam M, Whitaker K, Handwerker D. 2021.  
757 TE-dependent analysis of multi-echo fMRI with tedana. *J Open Source Softw* **6**:3669.  
758 doi:10.21105/joss.03669
- 759 Folstein MF, Folstein SE, McHugh PR. 1975. “Mini-mental state.” *J Psychiatr Res* **12**:189–198.  
760 doi:10.1016/0022-3956(75)90026-6
- 761 Fox MD, Raichle ME. 2007. Spontaneous fluctuations in brain activity observed with functional  
762 magnetic resonance imaging. *Nat Rev Neurosci* **8**:700–711. doi:10.1038/nrn2201
- 763 Franzmeier N., Caballero MAA, Taylor ANW, Simon-Vermot L, Buerger K, Ertl-Wagner B,  
764 Mueller C, Catak C, Janowitz D, Baykara E, Gesierich B, Duering M, Ewers M,  
765 Alzheimer’s Disease Neuroimaging Initiative. 2017. Resting-state global functional  
766 connectivity as a biomarker of cognitive reserve in mild cognitive impairment. *Brain*  
767 *Imaging Behav* **11**:368–382. doi:10.1007/s11682-016-9599-1
- 768 Franzmeier Nicolai, Duering M, Weiner M, Dichgans M, Ewers M, Alzheimer’s Disease  
769 Neuroimaging Initiative (ADNI). 2017a. Left frontal cortex connectivity underlies  
770 cognitive reserve in prodromal Alzheimer disease. *Neurology* **88**:1054–1061.  
771 doi:10.1212/WNL.0000000000003711
- 772 Franzmeier Nicolai, Göttler J, Grimmer T, Drzezga A, Áraque-Caballero MA, Simon-Vermot L,  
773 Taylor ANW, Bürger K, Catak C, Janowitz D, Müller C, Duering M, Sorg C, Ewers M.  
774 2017b. Resting-State Connectivity of the Left Frontal Cortex to the Default Mode and  
775 Dorsal Attention Network Supports Reserve in Mild Cognitive Impairment. *Front Aging*  
776 *Neurosci* **9**:264. doi:10.3389/fnagi.2017.00264
- 777 Gazzaley A, Cooney JW, Rissman J, D’Esposito M. 2005. Top-down suppression deficit  
778 underlies working memory impairment in normal aging. *Nat Neurosci* **8**:1298–1300.  
779 doi:10.1038/nn1543
- 780 Geerligs L, Renken RJ, Saliassi E, Maurits NM, Lorst MM. 2015. A Brain-Wide Study of Age-  
781 Related Changes in Functional Connectivity. *Cereb Cortex N Y N 1991* **25**:1987–1999.  
782 doi:10.1093/cercor/bhu012
- 783 Gold Brian T., Johnson NF, Powell DK. 2013. Lifelong bilingualism contributes to cognitive  
784 reserve against white matter integrity declines in aging. *Neuropsychologia* **51**:2841–  
785 2846. doi:10.1016/j.neuropsychologia.2013.09.037
- 786 Gold B. T., Kim C, Johnson NF, Kryscio RJ, Smith CD. 2013. Lifelong Bilingualism Maintains  
787 Neural Efficiency for Cognitive Control in Aging. *J Neurosci* **33**:387–396.  
788 doi:10.1523/JNEUROSCI.3837-12.2013
- 789 Grady C, Sarraf S, Saverino C, Campbell K. 2016. Age differences in the functional interactions  
790 among the default, frontoparietal control, and dorsal attention networks. *Neurobiol Aging*  
791 **41**:159–172. doi:10.1016/j.neurobiolaging.2016.02.020

- 792 Grady CL, Luk G, Craik FIM, Bialystok E. 2015. Brain network activity in monolingual and  
793 bilingual older adults. *Neuropsychologia* **66**:170–181.  
794 doi:10.1016/j.neuropsychologia.2014.10.042
- 795 Grady CL, Springer MV, Hongwanishkul D, McIntosh AR, Winocur G. 2006. Age-related  
796 Changes in Brain Activity across the Adult Lifespan. *J Cogn Neurosci* **18**:227–241.  
797 doi:10.1162/jocn.2006.18.2.227
- 798 Grundy JG, Anderson JAE, Bialystok E. 2017. Neural correlates of cognitive processing in  
799 monolinguals and bilinguals: Neural correlates of bilingualism. *Ann N Y Acad Sci*  
800 **1396**:183–201. doi:10.1111/nyas.13333
- 801 Gullifer JW, Chai XJ, Whitford V, Pivneva I, Baum S, Klein D, Titone D. 2018. Bilingual  
802 experience and resting-state brain connectivity: Impacts of L2 age of acquisition and  
803 social diversity of language use on control networks. *Neuropsychologia* **117**:123–134.  
804 doi:10.1016/j.neuropsychologia.2018.04.037
- 805 Gullifer JW, Titone D. 2020. Characterizing the social diversity of bilingualism using language  
806 entropy. *Biling Lang Cogn* **23**:283–294. doi:10.1017/S1366728919000026
- 807 Hagmann P, Cammoun L, Gigandet X, Meuli R, Honey CJ, Wedeen VJ, Sporns O. 2008.  
808 Mapping the Structural Core of Human Cerebral Cortex. *PLoS Biol* **6**:e159.  
809 doi:10.1371/journal.pbio.0060159
- 810 Healey MK, Campbell KL, Hasher L. 2008. Chapter 22 Cognitive aging and increased  
811 distractibility: Costs and potential benefits *Progress in Brain Research*. Elsevier. pp. 353–  
812 363. doi:10.1016/S0079-6123(07)00022-2
- 813 Ho DE, Imai K, King G, Stuart EA. 2011. MatchIt: Nonparametric Preprocessing for Parametric  
814 Causal Inference. *J Stat Softw* **42**. doi:10.18637/jss.v042.i08
- 815 Ho DE, Imai K, King G, Stuart EA. 2007. Matching as Nonparametric Preprocessing for  
816 Reducing Model Dependence in Parametric Causal Inference. *Polit Anal* **15**:199–236.  
817 doi:10.1093/pan/mpl013
- 818 Kelly C, Castellanos FX. 2014. Strengthening Connections: Functional Connectivity and Brain  
819 Plasticity. *Neuropsychol Rev* **24**:63–76. doi:10.1007/s11065-014-9252-y
- 820 Kroll JF, Bobb SC, Hoshino N. 2014. Two Languages in Mind: Bilingualism as a Tool to  
821 Investigate Language, Cognition, and the Brain. *Curr Dir Psychol Sci* **23**:159–163.  
822 doi:10.1177/0963721414528511
- 823 Kroll JF, Dussias PE, Bogulski CA, Kroff JRV. 2012. Juggling Two Languages in One  
824 Mind *Psychology of Learning and Motivation*. Elsevier. pp. 229–262. doi:10.1016/B978-  
825 0-12-394393-4.00007-8
- 826 Kruschwitz JD, List D, Waller L, Rubinov M, Walter H. 2015. GraphVar: A user-friendly  
827 toolbox for comprehensive graph analyses of functional brain connectivity. *J Neurosci*  
828 *Methods* **245**:107–115. doi:10.1016/j.jneumeth.2015.02.021
- 829 Kundu P, Brenowitz ND, Voon V, Worbe Y, Vértes PE, Inati SJ, Saad ZS, Bandettini PA,  
830 Bullmore ET. 2013. Integrated strategy for improving functional connectivity mapping  
831 using multiecho fMRI. *Proc Natl Acad Sci* **110**:16187–16192.  
832 doi:10.1073/pnas.1301725110
- 833 Kundu P, Inati SJ, Evans JW, Luh W-M, Bandettini PA. 2012. Differentiating BOLD and non-  
834 BOLD signals in fMRI time series using multi-echo EPI. *NeuroImage* **60**:1759–1770.  
835 doi:10.1016/j.neuroimage.2011.12.028

- 836 Lewis CM, Baldassarre A, Committeri G, Romani GL, Corbetta M. 2009. Learning sculpts the  
837 spontaneous activity of the resting human brain. *Proc Natl Acad Sci U S A* **106**:17558–  
838 17563. doi:10.1073/pnas.0902455106
- 839 Li L, Abutalebi J, Zou L, Yan X, Liu L, Feng X, Wang R, Guo T, Ding G. 2015. Bilingualism  
840 alters brain functional connectivity between “control” regions and “language” regions:  
841 Evidence from bimodal bilinguals. *Neuropsychologia* **71**:236–247.  
842 doi:10.1016/j.neuropsychologia.2015.04.007
- 843 Luk G, Bialystok E, Craik FIM, Grady CL. 2011. Lifelong Bilingualism Maintains White Matter  
844 Integrity in Older Adults. *J Neurosci* **31**:16808–16813. doi:10.1523/JNEUROSCI.4563-  
845 11.2011
- 846 Lustig C, Snyder AZ, Bhakta M, O’Brien KC, McAvoy M, Raichle ME, Morris JC, Buckner RL.  
847 2003. Functional deactivations: Change with age and dementia of the Alzheimer type.  
848 *Proc Natl Acad Sci* **100**:14504–14509. doi:10.1073/pnas.2235925100
- 849 Macbeth A, Higby E, Atagi N, Chiarello C. 2021. Evidence for cognitive and brain reserve  
850 supporting executive control of memory in lifelong bilinguals. *Neuropsychologia*  
851 **160**:107958. doi:10.1016/j.neuropsychologia.2021.107958
- 852 Marin-Marín L, Costumero V, Belloch V, Escudero J, Baquero M, Parcet M-A, Ávila C. 2020.  
853 Effects of bilingualism on white matter atrophy in mild cognitive impairment: a diffusion  
854 tensor imaging study. *Eur J Neurol* **27**:603–608. doi:10.1111/ene.14135
- 855 Marin-Marín L, Palomar-García M-Á, Miró-Padilla A, Adrián-Ventura J, Aguirre N, Villar-  
856 Rodríguez E, Costumero V. 2021. Bilingualism’s Effects on Resting-State Functional  
857 Connectivity in Mild Cognitive Impairment. *Brain Connect* **11**:30–37.  
858 doi:10.1089/brain.2020.0877
- 859 Martin CG, He BJ, Chang C. 2021. State-related neural influences on fMRI connectivity  
860 estimation. *NeuroImage* **244**:118590. doi:10.1016/j.neuroimage.2021.118590
- 861 Miller SL, Celone K, DePeau K, Diamond E, Dickerson BC, Rentz D, Pihlajamäki M, Sperling  
862 RA. 2008. Age-related memory impairment associated with loss of parietal deactivation  
863 but preserved hippocampal activation. *Proc Natl Acad Sci U S A* **105**:2181–2186.  
864 doi:10.1073/pnas.0706818105
- 865 Nostro AD, Müller VI, Varikuti DP, Pläschke RN, Hoffstaedter F, Langner R, Patil KR,  
866 Eickhoff SB. 2018. Predicting personality from network-based resting-state functional  
867 connectivity. *Brain Struct Funct* **223**:2699–2719. doi:10.1007/s00429-018-1651-z
- 868 Oh H, Razlighi QR, Stern Y. 2018. Multiple pathways of reserve simultaneously present in  
869 cognitively normal older adults. *Neurology* **90**:e197–e205.  
870 doi:10.1212/WNL.0000000000004829
- 871 Olsen RK, Pangelinan MM, Bogulski C, Chakravarty MM, Luk G, Grady CL, Bialystok E. 2015.  
872 The effect of lifelong bilingualism on regional grey and white matter volume. *Brain Res*  
873 **1612**:128–139. doi:10.1016/j.brainres.2015.02.034
- 874 Park DC, Hedden T, Davidson NS, Lautenschlager G, Smith AD, Smith PK. 2002. Models of  
875 visuospatial and verbal memory across the life span. *Psychol Aging* 299–320.
- 876 Perani D, Farsad M, Ballarini T, Lubian F, Malpetti M, Fracchetti A, Magnani G, March A,  
877 Abutalebi J. 2017. The impact of bilingualism on brain reserve and metabolic  
878 connectivity in Alzheimer’s dementia. *Proc Natl Acad Sci* **114**:1690–1695.  
879 doi:10.1073/pnas.1610909114

- 880 Pietzuch M, King AE, Ward DD, Vickers JC. 2019. The Influence of Genetic Factors and  
881 Cognitive Reserve on Structural and Functional Resting-State Brain Networks in Aging  
882 and Alzheimer’s Disease. *Front Aging Neurosci* **11**:30. doi:10.3389/fnagi.2019.00030  
883 Power JD, Cohen AL, Nelson SM, Wig GS, Barnes KA, Church JA, Vogel AC, Laumann TO,  
884 Miezin FM, Schlaggar BL, Petersen SE. 2011. Functional Network Organization of the  
885 Human Brain. *Neuron* **72**:665–678. doi:10.1016/j.neuron.2011.09.006  
886 Power JD, Plitt M, Gotts SJ, Kundu P, Voon V, Bandettini PA, Martin A. 2018. Ridding fMRI  
887 data of motion-related influences: Removal of signals with distinct spatial and physical  
888 bases in multiecho data. *Proc Natl Acad Sci* **115**. doi:10.1073/pnas.1720985115  
889 Rosenbaum PR, Rubin DB. 1983. The central role of the propensity score in observational  
890 studies for causal effects. *Biometrika* **70**:41–55.  
891 Rubinov M, Sporns O. 2010. Complex network measures of brain connectivity: Uses and  
892 interpretations. *NeuroImage* **52**:1059–1069. doi:10.1016/j.neuroimage.2009.10.003  
893 Schaefer A, Kong R, Gordon EM, Laumann TO, Zuo X-N, Holmes AJ, Eickhoff SB, Yeo BTT.  
894 2018. Local-Global Parcellation of the Human Cerebral Cortex from Intrinsic Functional  
895 Connectivity MRI. *Cereb Cortex N Y N 1991* **28**:3095–3114. doi:10.1093/cercor/bhx179  
896 Schweizer TA, Ware J, Fischer CE, Craik FIM, Bialystok E. 2012. Bilingualism as a contributor  
897 to cognitive reserve: Evidence from brain atrophy in Alzheimer’s disease. *Cortex*  
898 **48**:991–996. doi:10.1016/j.cortex.2011.04.009  
899 Setton R, Mwilambwe-Tshilobo L, Girn M, Lockrow AW, Baracchini G, Hughes C, Lowe AJ,  
900 Cassidy BN, Li J, Luh W-M, Bzdok D, Leahy RM, Ge T, Margulies DS, Misić B,  
901 Bernhardt BC, Stevens WD, De Brigard F, Kundu P, Turner GR, Spreng RN. 2022. Age  
902 differences in the functional architecture of the human brain. *Cereb Cortex N Y N 1991*  
903 bhac056. doi:10.1093/cercor/bhac056  
904 Smith SM, Jenkinson M, Woolrich MW, Beckmann CF, Behrens TEJ, Johansen-Berg H,  
905 Bannister PR, De Luca M, Drobnjak I, Flitney DE, Niazy RK, Saunders J, Vickers J,  
906 Zhang Y, De Stefano N, Brady JM, Matthews PM. 2004. Advances in functional and  
907 structural MR image analysis and implementation as FSL. *NeuroImage* **23**:S208–S219.  
908 doi:10.1016/j.neuroimage.2004.07.051  
909 Song S, Stern Y, Gu Y. 2022. Modifiable lifestyle factors and cognitive reserve: A systematic  
910 review of current evidence. *Ageing Res Rev* **74**:101551. doi:10.1016/j.arr.2021.101551  
911 Spreng RN, Fernández-Cabello S, Turner GR, Stevens WD. 2019. Take a deep breath: Multiecho  
912 fMRI denoising effectively removes head motion artifacts, obviating the need for global  
913 signal regression. *Proc Natl Acad Sci* **116**:19241–19242. doi:10.1073/pnas.1909848116  
914 Spreng RN, Lockrow AW, DuPre E, Setton R, Spreng KAP, Turner GR. 2018. Semanticized  
915 autobiographical memory and the default – executive coupling hypothesis of aging.  
916 *Neuropsychologia* **110**:37–43. doi:10.1016/j.neuropsychologia.2017.06.009  
917 Spreng RN, Schacter DL. 2012. Default Network Modulation and Large-Scale Network  
918 Interactivity in Healthy Young and Old Adults. *Cereb Cortex* **22**:2610–2621.  
919 doi:10.1093/cercor/bhr339  
920 Spreng RN, Sepulcre J, Turner GR, Stevens WD, Schacter DL. 2013. Intrinsic Architecture  
921 Underlying the Relations among the Default, Dorsal Attention, and Frontoparietal  
922 Control Networks of the Human Brain. *J Cogn Neurosci* **25**:74–86.  
923 doi:10.1162/jocn\_a\_00281



- 924 Spreng RN, Stevens WD, Chamberlain JP, Gilmore AW, Schacter DL. 2010. Default network  
925 activity, coupled with the frontoparietal control network, supports goal-directed  
926 cognition. *NeuroImage* **53**:303–317. doi:10.1016/j.neuroimage.2010.06.016
- 927 Spreng RN, Stevens WD, Viviano JD, Schacter DL. 2016. Attenuated anticorrelation between  
928 the default and dorsal attention networks with aging: evidence from task and rest.  
929 *Neurobiol Aging* **45**:149–160. doi:10.1016/j.neurobiolaging.2016.05.020
- 930 Spreng RN, Turner GR. 2019. The Shifting Architecture of Cognition and Brain Function in  
931 Older Adulthood. *Perspect Psychol Sci* **14**:523–542. doi:10.1177/1745691619827511
- 932 Stern Y. 2021. How Can Cognitive Reserve Promote Cognitive and Neurobehavioral Health?  
933 *Arch Clin Neuropsychol* **36**:1291–1295. doi:10.1093/arclin/acab049
- 934 Stern Y, Varangis E, Habeck C. 2021. A framework for identification of a resting-bold  
935 connectome associated with cognitive reserve. *NeuroImage* **232**:117875.  
936 doi:10.1016/j.neuroimage.2021.117875
- 937 Stevens WD, Buckner RL, Schacter DL. 2010. Correlated low-frequency BOLD fluctuations in  
938 the resting human brain are modulated by recent experience in category-preferential  
939 visual regions. *Cereb Cortex N Y N 1991* **20**:1997–2006. doi:10.1093/cercor/bhp270
- 940 Stevens WD, Hasher L, Chiew KS, Grady CL. 2008. A Neural Mechanism Underlying Memory  
941 Failure in Older Adults. *J Neurosci* **28**:12820–12824. doi:10.1523/JNEUROSCI.2622-  
942 08.2008
- 943 Stevens WD, Spreng RN. 2014. Resting-state functional connectivity MRI reveals active  
944 processes central to cognition: Cognition and resting-state functional connectivity. *Wiley*  
945 *Interdiscip Rev Cogn Sci* **5**:233–245. doi:10.1002/wcs.1275
- 946 Sulpizio S, Del Maschio N, Del Mauro G, Fedeli D, Abutalebi J. 2020. Bilingualism as a  
947 gradient measure modulates functional connectivity of language and control networks.  
948 *NeuroImage* **205**:116306. doi:10.1016/j.neuroimage.2019.116306
- 949 Tambini A, Ketz N, Davachi L. 2010. Enhanced brain correlations during rest are related to  
950 memory for recent experiences. *Neuron* **65**:280–290. doi:10.1016/j.neuron.2010.01.001
- 951 Thieba C, Long X, Dewey D, Lebel C. 2019. Young children in different linguistic  
952 environments: A multimodal neuroimaging study of the inferior frontal gyrus. *Brain*  
953 *Cogn* **134**:71–79. doi:10.1016/j.bandc.2018.05.009
- 954 Turner GR, Spreng RN. 2015. Prefrontal Engagement and Reduced Default Network  
955 Suppression Co-occur and Are Dynamically Coupled in Older Adults: The Default–  
956 Executive Coupling Hypothesis of Aging. *J Cogn Neurosci* **27**:2462–2476.  
957 doi:10.1162/jocn\_a\_00869
- 958 van Heuven WJB, Schriefers H, Dijkstra T, Hagoort P. 2008. Language conflict in the bilingual  
959 brain. *Cereb Cortex N Y N 1991* **18**:2706–2716. doi:10.1093/cercor/bhn030
- 960 van Oort ESB, van Cappellen van Walsum AM, Norris DG. 2014. An investigation into the  
961 functional and structural connectivity of the Default Mode Network. *NeuroImage*  
962 **90**:381–389. doi:10.1016/j.neuroimage.2013.12.051
- 963 Weiler M, Casseb RF, de Campos BM, de Ligo Teixeira CV, Carletti-Cassani AFMK, Vicentini  
964 JE, Magalhães TNC, de Almeida DQ, Talib LL, Forlenza OV, Balthazar MLF, Castellano  
965 G. 2018. Cognitive Reserve Relates to Functional Network Efficiency in Alzheimer’s  
966 Disease. *Front Aging Neurosci* **10**.
- 967 Wig GS. 2017. Segregated Systems of Human Brain Networks. *Trends Cogn Sci* **21**:981–996.  
968 doi:10.1016/j.tics.2017.09.006

- 969 Wig GS, Laumann TO, Petersen SE. 2014. An approach for parcellating human cortical areas  
970 using resting-state correlations. *NeuroImage* **93**:276–291.  
971 doi:10.1016/j.neuroimage.2013.07.035
- 972 Wig GS, Schlaggar BL, Petersen SE. 2011. Concepts and principles in the analysis of brain  
973 networks. *Ann N Y Acad Sci* **1224**:126–146. doi:10.1111/j.1749-6632.2010.05947.x
- 974 Wu G, Li S-J. 2005. Theoretical noise model for oxygenation-sensitive magnetic resonance  
975 imaging. *Magn Reson Med* **53**:1046–1054. doi:10.1002/mrm.20451
- 976 Yeo BTT, Krienen FM, Sepulcre J, Sabuncu MR, Lashkari D, Hollinshead M, Roffman JL,  
977 Smoller JW, Zöllei L, Polimeni JR, Fischl B, Liu H, Buckner RL. 2011. The organization  
978 of the human cerebral cortex estimated by intrinsic functional connectivity. *J*  
979 *Neurophysiol* **106**:1125–1165. doi:10.1152/jn.00338.2011
- 980 Zanto TP, Rubens MT, Thangavel A, Gazzaley A. 2011. Causal role of the prefrontal cortex in  
981 top-down modulation of visual processing and working memory. *Nat Neurosci* **14**:656–  
982 661. doi:10.1038/nn.2773
- 983
- 984

985

## Supplementary Material

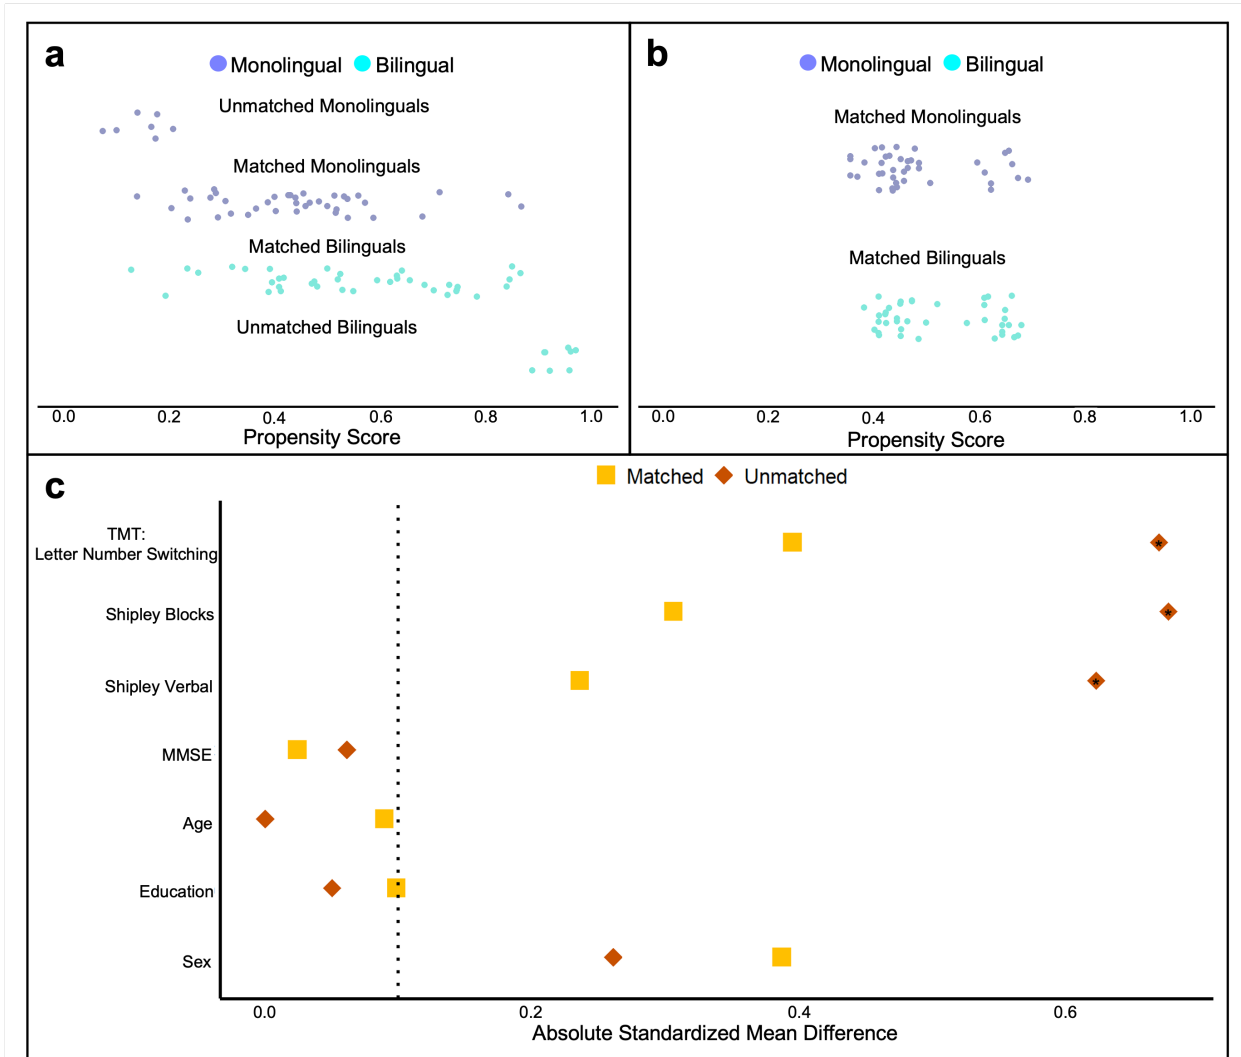

986

987

988

989 **SupplementaryFigure 1:** Propensity score matching (PSM) of monolingual and bilingual

990 groups. (a) Distribution of propensity scores for the matched monolingual (n = 39) and bilingual

991 (n = 39) groups and excluded (unmatched) participants following PSM on cognitive measures.

992 (b) Distribution of propensity scores for the matched monolingual and bilingual groups

993 following PSM on demographic variables, which did not change group membership. (c)

994 Absolute standardized mean difference between monolinguals and bilinguals on each of the

995 cognitive and demographic variables for the matched and unmatched groups. Significant

996 differences (indicated by an asterisk) between the unmatched monolingual and bilingual groups

997 on three cognitive measures (TMT Letter Number Switching, Shipley Blocks, and Shipley

998 Verbal scores) were eliminated in the matched groups following PSM. TMT, Trail Making Task;

999 MMSE, Mini \* p < 0.01

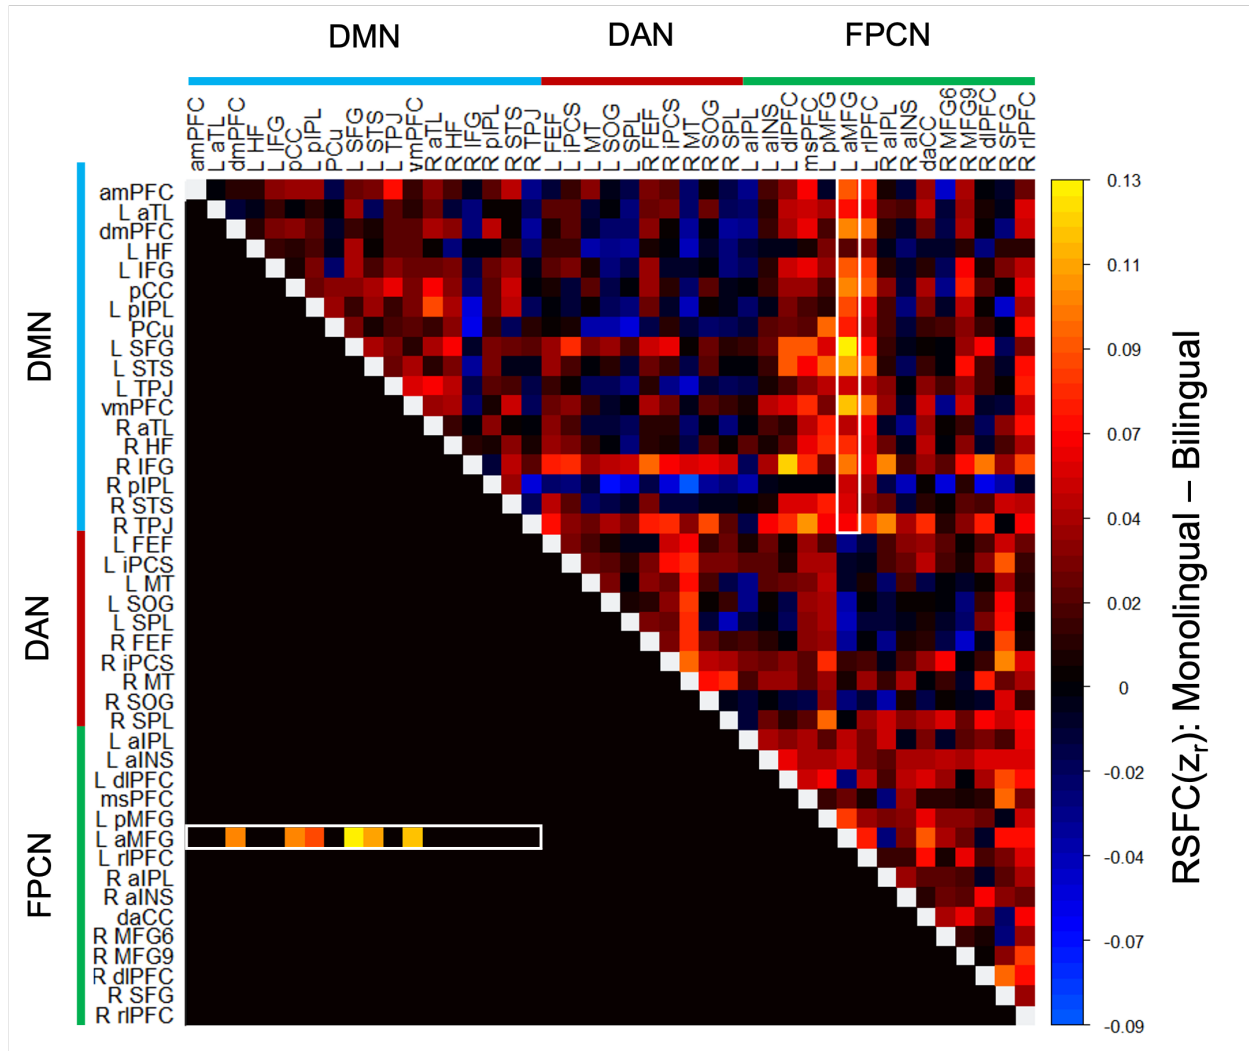

1000  
1001

1002 **Supplementary Figure 2:** Differences in RSFC within and between the DMN, DAN, and  
 1003 FPCN. Monolingual older adults show stronger RSFC of the left aMFG with multiple nodes of  
 1004 the DMN, relative to bilinguals. Full pairwise correlation matrix of all 43 nodes of the FPCN,  
 1005 DMN, and DAN: upper half of the matrix shows group differences (monolingual - bilingual) in  
 1006 mean RSFC for all pairwise correlations between nodes; lower half of the matrix shows only the  
 1007 statistically significant differences (permutation test:  $q < 0.05$ , FDR corrected). The left aMFG  
 1008 showed stronger RSFC with 6 nodes of the DMN: dmPFC\*, pCC\*, left IPL\*, left SFG\*\*, left  
 1009 STS\*, and vmPFC\*. RSFC, resting-state functional connectivity;  $z_r$ , Fisher z-transformed  
 1010 correlation; FPCN, frontoparietal control network; DMN, default mode network; DAN, dorsal  
 1011 attention network; for full list of all node label definitions, see Supplementary Table 1. \*  $p <$   
 1012 0.002; \*\*  $p < 0.001$



1013 Supplementary Table 1. List of all nodes of default mode network, dorsal attention network, and  
 1014 frontoparietal control network, and their abbreviations.

| Region and Network Affiliation        | Abbreviation | Coordinate (x y z) |
|---------------------------------------|--------------|--------------------|
| <b>Default Mode Network</b>           |              |                    |
| <i>Left Hemisphere</i>                |              |                    |
| Anterior medial prefrontal cortex     | amPFC        | -8 56 14           |
| Anterior temporal lobe                | L aTL        | -52 -10 -20        |
| Dorsal medial prefrontal cortex       | dmPFC        | -8 50 34           |
| Hippocampal formation                 | L HF         | -26 -8 -24         |
| Inferior frontal gyrus                | L IFG        | -42 26 -14         |
| Posterior cingulate cortex            | pCC          | -2 -48 28          |
| Posterior inferior parietal lobe      | L pIPL       | -50 -60 28         |
| Precuneus                             | PCu          | -2 -60 50          |
| Superior frontal gyrus                | L SFG        | -8 20 62           |
| Superior temporal sulcus              | L STS        | -60 -28 -4         |
| Temporal parietal junction            | L TPJ        | -44 -52 22         |
| Ventral medial prefrontal cortex      | vmPFC        | -2 44 -12          |
| <i>Right Hemisphere</i>               |              |                    |
| Anterior temporal lobe                | R aTL        | 52 -4 -16          |
| Hippocampal formation                 | R HF         | 24 -14 -22         |
| Inferior frontal gyrus                | R IFG        | 50 32 -6           |
| Posterior inferior parietal lobe      | R pIPL       | 58 -60 28          |
| Superior temporal sulcus              | R STS        | 50 -36 4           |
| Temporal parietal junction            | R TPJ        | 44 -58 18          |
| <b>Dorsal Attention Network</b>       |              |                    |
| <i>Left Hemisphere</i>                |              |                    |
| Frontal Eye Fields                    | L FEF        | -24 2 62           |
| Inferior Precentral Sulcus            | L iPCS       | -36 0 28           |
| Middle temporal motion complex        | L MT         | -44 -66 0          |
| Superior occipital gyrus              | L SOG        | -18 -66 50         |
| Superior parietal lobule              | L SPL        | -30 -48 52         |
| <i>Right Hemisphere</i>               |              |                    |
| Frontal Eye Fields                    | R FEF        | 24 -2 56           |
| Inferior Precentral Sulcus            | R iPCS       | 42 6 26            |
| Middle temporal motion complex        | R MT         | 54 -54 -6          |
| Superior occipital gyrus              | R SOG        | 26 -64 54          |
| Superior parietal lobule              | R SPL        | 38 -46 54          |
| <b>Frontoparietal Control Network</b> |              |                    |
| <i>Left Hemisphere</i>                |              |                    |
| Anterior inferior parietal lobule     | L aIPL       | -54 -48 48         |
| Anterior insula                       | L aINS       | -30 20 -2          |

|                                   |         |           |
|-----------------------------------|---------|-----------|
| Dorsal lateral prefrontal cortex  | L dIPFC | -38 32 30 |
| Medial superior prefrontal cortex | msPFC   | -2 20 50  |
| Posterior middle frontal gyrus    | L pMFG  | -28 14 58 |
| Anterior middle frontal gyrus     | L aMFG  | -40 24 34 |
| Rostrolateral prefrontal cortex   | L rIPFC | -32 58 2  |
| <i>Right Hemisphere</i>           |         |           |
| Anterior inferior parietal lobule | R aIPL  | 50 -44 46 |
| Anterior insula                   | R aINS  | 32 20 -4  |
| Dorsal anterior cingulate cortex  | daCC    | 6 30 40   |
| Posterior middle frontal gyrus    | R MFG6  | 26 16 48  |
| Anterior middle frontal gyrus     | R MFG9  | 44 26 42  |
| Dorsal lateral prefrontal cortex  | R dIPFC | 44 42 26  |
| Superior frontal gyrus            | R SFG   | 12 18 62  |
| Rostrolateral prefrontal cortex   | R rIPFC | 32 58 8   |

1015 R, right; L, left; Coordinate (x, y, z) are in MNI\_152 space.
